1 **TITLE PAGE**

2

3 **Excess weight increases the risk for neurological and neuropsychiatric symptoms in**

4 **post-COVID-19 condition: A systematic review and meta-analysis**

5 **Short title: Excess weight increases Post-COVID-19 Condition neuro-symptoms**

6

7 Débora Barbosa Ronca<sup>1,2¶\*,#a</sup>, Larissa Otaviano Mesquita<sup>1,&</sup>, Dryelle Oliveira<sup>3</sup>, Ana  
8 Cláudia Morais Godoy Figueiredo<sup>2,4,&</sup>, Jun Wen<sup>5</sup>, Manshu Song<sup>6</sup>, Kênia Mara Baiocchi  
9 de Carvalho<sup>1,3¶</sup>

10 <sup>1</sup> Graduate Program of Public Health, Faculty of Health Sciences, University of Brasília;  
11 Brasília, Federal District, Brazil.

12 <sup>2</sup> Health Department of Federal District, Brasília, Federal District, Brazil.

13 <sup>3</sup> Graduate Program of Human Nutrition, Faculty of Health Sciences, University of  
14 Brasília, Brasília, Federal District, Brazil.

15 <sup>4</sup> Superior School of Health Sciences, Brasília, Federal District, Brazil.

16 <sup>5</sup> Faculty of Hospitality and Tourism Management, Macau University of Science and  
17 Technology, Macau SAR, China.

18 <sup>6</sup> School of Medical and Health Sciences, Edith Cowan University, Perth, Western  
19 Australia, Australia.

20 <sup>#a</sup>Current address: School of Medical and Health Sciences, Edith Cowan University, Perth,  
21 Western Australia, Australia.

22

23 **Corresponding authors:** Débora Barbosa Ronca. E-mail: [d.ronca@ecu.edu.au](mailto:d.ronca@ecu.edu.au) /  
24 [deboraronca@gmail.com](mailto:deboraronca@gmail.com) (DBR)

25 **Co-corresponding authors:** Kênia Mara Baiocchi de Carvalho. E-mail: [kenia@unb.br](mailto:kenia@unb.br)  
26 (KMBC); Manshu Song. E-mail: [m.song@ecu.edu.au](mailto:m.song@ecu.edu.au) (MS)

27

## 28 **Abstract**

29 **Background/purpose:** Excess weight has been identified as a potential risk factor for the  
30 development of post-COVID-19 condition (PCC). This review investigates whether  
31 excess weight increases the risk of neurological and neuropsychiatric symptoms  
32 associated with PCC. **Methods:** Studies published up to July 2023 were searched  
33 independently across eight electronic databases to evaluate the risk of developing  
34 neurological and neuropsychiatric symptoms more than 12 weeks post-infection between  
35 exposure and controls groups (excess weight *vs.* normal weight; obesity *vs.* non-obesity).  
36 Meta-analyses were conducted under a random-effects model. **Results:** Of the 10,122  
37 abstracts screened, 18 studies ( $n = 139,091$  adults) met the inclusion criteria and reported  
38 PCC symptoms according to nutritional status. These studies included 79,050 individuals  
39 with excess weight *vs.* 57,926 normal-weight individuals and 30,694 individuals with  
40 obesity *vs.* 107,612 non-obese individuals. The presence of excess weight in PCC  
41 significantly increased the risk of depression (RR = 1.21; 95% CI: 1.03–1.42), headache  
42 (RR = 1.21; 95% CI: 1.09–1.35), memory issues (RR = 1.43; 95% CI: 1.24–1.65), sleep  
43 disturbance (RR = 1.31; 95% CI: 1.16–1.48), and vertigo (RR = 1.21; 95% CI: 1.04–  
44 1.41). Obesity significantly increased the risk of headache (RR = 1.41; 95% CI: 1.34–  
45 1.49), smell disorder (RR = 1.15; 95% CI: 1.09–1.21), taste disorder (RR = 1.21; 95% CI:  
46 1.07–1.36), and vertigo (RR = 1.44; 95% CI: 1.35–1.53). **Conclusions:** Excess weight or  
47 obesity increases the risk of experiencing neuro-symptoms related to PCC. Individuals  
48 with these conditions urgently need enhanced personalized care management in current  
49 post-pandemic context.

50 **Keywords:** Post-COVID-19 condition, Neurological symptoms, Neuropsychiatric  
51 symptoms, Obesity, Systematic review

52

## 54 **Introduction**

55 A growing body of evidence suggests that a subset of COVID-19 survivors  
56 develop persistent, debilitating symptoms and may face a long road to complete  
57 recovery[1–4]. These symptoms have been shown to affect multiple organ systems, as  
58 evidenced by respiratory, cardiovascular, neurological, and mental health manifestations.  
59 This emergent condition has several names: long-COVID; post-acute sequelae of SARS-  
60 CoV-2 syndrome; and, as per the World Health Organization (WHO), post-COVID-19  
61 condition (PCC). Although PCC has no uniform definition in the literature, it is generally  
62 described as involving persistent symptoms or new symptom onset, typically 12 weeks  
63 from the acute phase of COVID-19[5, 6], presenting a novel challenge to healthcare  
64 systems[7].

65 To date, no comprehensive effective treatment has been recognized for PCC, and  
66 the common strategies are based on symptoms relief[8]. Among PCC’s range of  
67 symptoms, long-term COVID-19 neurological and neuropsychiatric manifestations are of  
68 particular interest given the higher incidence of nervous system related sequelae’s after  
69 post-viral epidemics[9]. Prior reviews revealed that smell and taste disorders, headache,  
70 sleep disturbance, anxiety and depression were among the most commonly reported  
71 persistent symptoms in the general population. However, these studies only follow  
72 participants for a few weeks post-COVID infection and do not meet the criteria for  
73 PCC[10–13]. The severity of the COVID-19 acute phase has been associated with the  
74 development of long-term COVID-19 neuropsychiatric symptoms[14]. The body mass  
75 index (BMI) has been regarded as a potential risk factor for PCC, although the association  
76 of excess weight (EW) with the development of specific neurological and  
77 neuropsychiatric symptoms remains unclear[15, 16]. Moreover, studies that reported the  
78 prevalence of persistent neurological and neuropsychiatric symptoms up to one year after

79 COVID-19 onset exhibited considerable heterogeneity and did not perform subgroups  
80 analyses according to nutritional status[2, 17]. An increased number of PCC symptoms  
81 that longer persist may be experienced by individuals with EW and might be associated  
82 to worsen health and poor quality of life[18].

83 It is noteworthy that EW is a chronic suboptimal health condition characterized by  
84 excessive fat deposits and is considered a global public health problem. It represents a  
85 major risk factor for other chronic conditions and encompasses overweight, a suboptimal  
86 body weight that represents a risk to health, and obesity, a metabolic disease[19, 20]. A  
87 complex yet costly care of individuals with EW is required, with appropriate  
88 multidisciplinary, long-term support[19]. In 2020, the overweight and obesity pandemic  
89 collided with the COVID-19 pandemic. These conditions' joint negative effects have  
90 increased the incidence of related diseases, leading to potentially adverse clinical and  
91 social consequences[21–23]. Obesity was found to be associated with poor COVID-19  
92 outcomes, such as hospital admissions, intensive care admissions, and lethality rates[24–  
93 26]. Although the COVID-19 pandemic has come under control, the multisystemic nature  
94 of this disease and its long-term impacts have yet to be elucidated[10, 27].

95 Although there is literature on the most commonly reported neurological and  
96 neuropsychiatric symptoms of PCC, few studies reported the risk of PCC symptoms  
97 according to nutritional status and no previous review has explored the association of EW  
98 and the risk of developing specific neurological or neuropsychiatric symptoms among  
99 COVID-19 survivors. Elucidating the long-term neuro-outcomes of COVID-19, along  
100 with its suite of symptoms and high-risk populations, is urgently needed to facilitate the  
101 development of reliable and personalized care management strategies. Therefore, this  
102 systematic review addresses whether EW increases the risk of developing specific  
103 persistent neurological or neuropsychiatric symptoms among COVID-19 survivors.

## 104 **Materials and Methods**

105 This study followed the Preferred Reporting Items for Systematic Reviews and  
106 Meta-Analyses (PRISMA) 2020 guidelines[28]. It is a subset of broad research aimed at  
107 investigating the role of EW in the development of persistent symptoms of PCC. This  
108 review was registered at the International Prospective Register of Systematic Reviews  
109 (PROSPERO) (ID: CRD42023433234).

### 110 **Search strategy and Eligibility Criteria**

111 Two authors (DBR and LOM) searched seven electronic databases (MEDLINE,  
112 EMBASE, SCOPUS, Web of Science, VHL, Google Scholar, ProQuest) and a preprint  
113 server (medRxiv) on 3 July 2023. The search strategy was reviewed by two reviewers  
114 according to the criteria of the Peer Review of Electronic Search Strategies (PRESS)  
115 checklist[29]. The search strategy included the following terms: (“long COVID-19” OR  
116 “post-acute covid 19 syndrome” OR “COVID-19” OR “SARS-CoV-2” OR “post-  
117 COVID-19 condition” OR “long hauler”) AND (“excess of weight” OR “overweight”  
118 OR “obesity” OR “body mass index”) AND (“signs and symptoms” OR “COVID-19  
119 sequelae” OR “headache” OR “loss of smell” OR “cognitive dysfunction” OR “anxiety”  
120 OR “depression” OR “sleep disorder” OR “brain fog.” The full search strategy is detailed  
121 in supporting information (S1 Table). Additionally, some articles were hand-searched to  
122 identify potentially eligible studies which might not be electronically retrieved, including  
123 those published in 2024.

124 Studies were considered eligible for inclusion if they (a) had observational  
125 designs; (b) primarily focused on adults; (c) classified focal populations based on the  
126 presence of excess weight/obesity *versus* normal weight/non-obesity, using either  
127 measured BMI or self-reported data; and (d) had a mean (or median) follow-up of at least  
128 12 weeks after the acute phase of COVID-19. Survivors could be (a) hospitalized or non-

129 hospitalized, (b) inpatient or outpatient, and (c) mixed population (hospitalized and  
130 outpatient) recruited in the community, outpatient clinic or health care system.

131 We exclude editorials, clinical trials, reviews, opinions, books or book chapters,  
132 conference abstracts, case reports, and correspondence articles. Studies were also  
133 excluded if they included mostly pregnant or nursing women; evaluated the health effects  
134 of COVID-19; assessed excess weight as a risk factor for acute-phase severity or  
135 mortality; or evaluated long-term sequelae of COVID-19 in a specific population (e.g.,  
136 individuals with specific comorbidities). Additionally, studies were excluded if they  
137 investigated clusters of symptoms rather than specific symptoms or if they lacked a  
138 control group (i.e., COVID-19 survivors who did not report persistent symptoms).

## 139 **Screening Process, Study Selection, and Data Extraction**

140 The same two authors (DBR and LOM) independently screened the titles and  
141 abstracts of studies obtained from database searches and removed duplicates. The Rayyan  
142 app[30], a semi-automation tool, was used to streamline the review process. This was  
143 followed by a full-text review of the retained articles to ensure they met eligibility criteria.

144 Fig 1 presents the flowchart for the included studies.

145

146 **Fig 1: Flow diagram of included studies.**

147

148 The study population of interest comprised COVID-19 survivors. Exposure was  
149 defined as EW or obesity based on BMI measurement, data from electronic medical  
150 records, or self-reported information. Two exposure groups were defined according to  
151 WHO guidelines[31]: 1) an excess weight group ( $BMI \geq 25 \text{ kg/m}^2$ ) and 2) an obesity  
152 group ( $BMI \geq 30 \text{ kg/m}^2$ ). Both Asian and Caucasian populations were included in the  
153 analysis, with corresponding BMI cut-offs applied: for Asian-Pacific populations, the

154 thresholds were BMI  $\geq 23$  kg/m<sup>2</sup> for EW and BMI  $\geq 25$  kg/m<sup>2</sup> for obesity, as previously  
155 defined in the included studies[32, 33].

156 We adopted WHO's definition of PCC as outlined by Soriano *et al.* (2021)[5].  
157 Symptoms were measured with predefined questionnaires/scales or reported during  
158 interviews (in person, by phone, or online). Due to varying definitions illness onset  
159 (baseline), we accepted definitions that included 12 weeks from the onset of COVID-19  
160 symptoms, COVID-19 diagnosis, hospital admission or discharge after the acute phase.  
161 For the follow-up period, we considered studies where the sample median (or mean) of  
162 persistent symptoms was reported at least 12 weeks (84 days) after the baseline, with a  
163 minimum interquartile range (IQR) of 10 weeks (or a standard deviation (SD) of  $\pm 24$   
164 days) from baseline. This cut-off was necessary to include studies evaluating long-term  
165 sequelae of COVID-19. Given the varied terminology used for symptoms across studies,  
166 we re-grouped symptoms into neurological and neuropsychiatric categories as shown in  
167 Fig 2.

168

169 **Fig 2: Reported neurological and neuropsychiatric symptoms related to Post-**  
170 **COVID-19 condition (PCC).** <sup>a</sup>Neurological and neuropsychiatric reported symptoms were grouped  
171 into one category with synonyms presented in brackets.

172

173 Specific data were exported from each study into a predefined data collection  
174 form, including authors; publication year; country; aim of the study; study design; mean  
175 follow-up period; study population; exposure groups; assessment of outcome; evaluated  
176 symptoms; frequency of symptoms (*n*, %) among exposure and control groups; and the  
177 effect measure of the association of EW and the neurological/neuropsychiatric symptom.  
178 Corresponding authors of relevant articles published were contacted if any data were  
179 absent.

## 180 **Quality Assessment**

181 The ROBINS-E tool for observational research was used to determine the risk of  
182 bias in the included studies[34]. ROBINS-E is a domain-based tool that evaluates seven  
183 domains (confounders, exposure measurement, participant selection, post-exposure  
184 interventions, missing data, outcome measurement, and selection of reported results) and  
185 then a general assessment of the study. Traffic plots with a final analysis of studies' risk  
186 of bias, by domain, is generated. For this research, two authors (DBR and DO) initially  
187 appraised the risk of bias. Disagreements were discussed and resolved in collaboration  
188 with a third researcher (LOM). The ROBINS-E tool was not applied as a study eligibility  
189 criterion.

190 We assessed the certainty of evidence via the Grading of Recommendations  
191 Assessment, Development and Evaluation (GRADE) framework [35–37] regarding the  
192 risk of developing PCC-related neurological and neuropsychiatric symptoms among  
193 individuals with EW. The GRADE system measures attributes that impact the overall  
194 quality of evidence. We assessed the certainty of evidence of the outcomes that were  
195 statistically significantly associated with exposures groups and scored it accordingly (i.e.,  
196 high =  $\geq 4$  points; moderate = 3 points; low = 2 points; very low = 1 point).

## 197 **Statistical Analysis**

198 The frequency of reported symptoms and the associated risk of development were  
199 determined for EW *vs* normal weight groups and for obesity *vs* non-obesity groups,  
200 classified by BMI when available (normal weight: BMI of 18–24.9 kg/m<sup>2</sup>; excess weight:  
201 BMI >25 kg/m<sup>2</sup>; obesity: BMI >30 kg/m<sup>2</sup>; non-obesity group: BMI <30 kg/m<sup>2</sup>), taking  
202 into account different cut-off values previously defined for the Chinese population in  
203 studies[32, 33]. Each symptom was considered an individual outcome. For this purpose,  
204 we collected data of the frequency (*n*, %) of each neurological and neuropsychiatric



205 symptoms related to PCC reported and the risk of developing persistent symptoms (as  
206 measured by the odds ratio [OR] or the adjusted OR) at follow-up in included studies.

207 We performed meta-analytic calculations using STATA software (SE/17). Pooled  
208 risk ratios (RRs) with their 95% confidence intervals (CIs) were computed from the raw  
209 data of the included studies. A random effects model meta-analysis was conducted to  
210 account for the statistical and methodological heterogeneity of the data. We used a two-  
211 sample binary-outcome summary dataset format with DerSimonian–Laird estimation  
212 when fewer than five studies were available[38]; when more than five studies were  
213 available, we adopted restricted maximum-likelihood estimation and to conduct pooled  
214 RR analysis. Statistical heterogeneity was assessed using the  $I^2$  statistic[39]. Forest plots  
215 were generated for all outcomes. Publication bias was examined by visual inspection of  
216 funnel plots. A value of  $p < 0.05$  was considered statistically significant.

217

## 218 **Results**

219 Of the 10,122 abstracts screened, 211 full-text registers were reviewed, and 65  
220 studies were considered eligible. Data on neurological and neuropsychiatric symptoms  
221 according to individuals' nutritional status were available for 18 studies (including one  
222 preprint[40]), all of which were entered into our meta-analysis.

223 Selected studies originated from 23 countries across Asia (China[32, 33],  
224 India[41], Indonesia[42], Japan[43], Malaysia[40] and Saudi Arabia[44]), Europe  
225 (Denmark[45, 46], England[47], Germany[48], Italy[49], Poland[50], Spain[51] and  
226 Switzerland[52]), and North and South America (Argentina[53], Brazil[53], Chile[53],  
227 Dominican Republic[53], Ecuador[53], Mexico[53], Panama[53], Paraguay[53],  
228 Peru[53] and United States of America[54, 55]), comprising both developed and  
229 developing countries. Among the included studies, two employed case–control design[51,

230 54], six involved retrospective or prospective cohorts[33, 42, 49, 50, 52, 55], and 10  
231 involved cross-sectional studies[32, 40, 41, 44–47, 47, 48, 53].

232 The populations investigated varied: three studies evaluated individuals in  
233 outpatient settings[46, 52, 54], five involved hospitalized patients[32, 33, 42, 49, 51] ,  
234 and ten included individuals either hospitalized or outpatient settings during COVID-19  
235 acute-phase[40, 41, 43, 44, 47, 48, 50, 53, 55]. The classification of individuals according  
236 to nutritional status also varied: four studies compared symptoms between individuals  
237 with EW and those with normal weight[32, 40, 42, 44], five studies evaluated obesity  
238 *versus* non-obesity[33, 48–51], eight studies presented data for individuals with normal  
239 weight, overweight and obesity[41, 45–47, 52–55], and one study only provided the mean  
240 BMI of the sample without specifying the number of individuals in exposure and control  
241 groups[43]. In total, our meta-analysis included 79,050 people with EW and 30,694 with  
242 obesity in exposure groups, while 57,926 normal weight individuals and 107,612 non-  
243 obese individuals comprised control groups. Sample sizes ranged from 32[54] to  
244 78,566[47] COVID-19 survivors. Two Chinese studies applied different cut-off points for  
245 nutritional status classification (EW as BMI  $\geq 23$  kg/m<sup>2</sup>; obesity as BMI  $\geq 25$  kg/m<sup>2</sup>)[32,  
246 33]. Exposure was assessed via anthropometric measures[32, 33, 41, 50, 53, 54],  
247 electronic medical record data[42, 46, 49, 51], and self-reported comorbidity/BMI[40,  
248 43–45, 47, 52, 55]. PCC neurological and neuropsychiatric symptoms were evaluated  
249 using questionnaires[33, 41, 43–47, 50–52, 54], validated scales[32, 40, 48, 49, 51, 54],  
250 or self-report instruments[42, 47, 48, 53, 55]. The mean time from COVID-19 onset  
251 (baseline) to long-term symptom assessment was 25.8 weeks (range: 12 weeks[42, 44,  
252 46, 47, 49] to 52 weeks [one year][32]). Table 1 outlines the features of the included  
253 articles.

254

Table 1. Characteristics of included studies.

| Author, Year                             | Country                                    | Study aim                                                                                                                            | Study design; Follow-up <sup>a</sup>                                                           | Study population                                                                                                                           | Categories of nutritional status                                                            | Assessment type                                                       | Main neurological (N) and neuropsychiatric (NP) symptoms evaluated                                                                           |
|------------------------------------------|--------------------------------------------|--------------------------------------------------------------------------------------------------------------------------------------|------------------------------------------------------------------------------------------------|--------------------------------------------------------------------------------------------------------------------------------------------|---------------------------------------------------------------------------------------------|-----------------------------------------------------------------------|----------------------------------------------------------------------------------------------------------------------------------------------|
| Alkwai, H.M. <i>et al.</i> , 2022 [44]   | Saudi Arabia                               | To analyze the persistence of COVID-19 symptoms and return to the usual state of health                                              | Cross-sectional; 12 weeks after COVID-19 infection                                             | Mixed population <sup>b</sup><br><i>n</i> = 108 (male = 23)<br>Age range: 18–65 years                                                      | Overweight ( <i>n</i> = 32)<br>Normal weight ( <i>n</i> = 181)                              | Online survey<br>Self-reported comorbidities<br>Symptom questionnaire | N: Concentration issues, headache, memory issues, numbness, smell disorder, taste disorder, vertigo<br>NP: mood change, sleep disturbance    |
| Blümel, J.E. <i>et al.</i> , 2022 [53]   | Nine Latin-American countries <sup>c</sup> | To study the development of long-term symptoms and the impacts of COVID-19 on mental health and quality of life in middle-aged women | Cross-sectional; 32 weeks after COVID-19 infection                                             | Mixed population <sup>b</sup><br>Sample of interest / study sample<br><i>n</i> = 304/1,238 (female only)<br>Age: 53.0 (range: 40–64 years) | Obesity ( <i>n</i> = 41)<br>Overweight ( <i>n</i> = 124)<br>Normal weight ( <i>n</i> = 139) | In-person interview<br>Measured BMI<br>Reported symptoms              | N: anorexia, cognitive deficit, headache, memory issues, numbness, smell disorder, taste disorder, vertigo<br>NP: anxiety, sleep disturbance |
| Bungenberg, J. <i>et al.</i> , 2022 [48] | Germany                                    | To identify and compare persistent self-reported symptoms in initially hospitalized and non-hospitalized patients after infection    | Cross-sectional; 13.4 weeks for non-hosp. and 41 weeks for hosp. patients after acute symptoms | Mixed population <sup>b</sup><br><i>n</i> = 50 (male = 22)<br>Age: 50.5 (range: 40–64 years)                                               | Obesity ( <i>n</i> = 7)<br>Non-obesity ( <i>n</i> = 43)                                     | In-person interview<br>Reported symptoms and scales                   | N: cognitive deficit, memory issues, smell disorder, taste disorder, vertigo<br>NP: sleep disturbance                                        |

| Author, Year                             | Country                  | Study aim                                                                                                                 | Study design; Follow-up <sup>a</sup>                            | Study population                                                                                                       | Categories of nutritional status                                                                     | Assessment type                                                                                                | Main neurological (N) and neuropsychiatric (NP) symptoms evaluated                                             |
|------------------------------------------|--------------------------|---------------------------------------------------------------------------------------------------------------------------|-----------------------------------------------------------------|------------------------------------------------------------------------------------------------------------------------|------------------------------------------------------------------------------------------------------|----------------------------------------------------------------------------------------------------------------|----------------------------------------------------------------------------------------------------------------|
| Carter, S.J. <i>et al.</i> , 2022 [54]   | United States of America | To compare functional status, mood state, and physical activity in leisure time among positive COVID-19 and controls      | Case-control; 12.1 weeks after COVID-19 diagnosis               | Outpatient<br><i>n</i> = 32 woman<br>SARS-CoV-2 group = 17<br><br>Age: 55 ± 11 years                                   | Obesity ( <i>n</i> = 4)<br>Overweight ( <i>n</i> = 6)<br>Normal weight ( <i>n</i> = 7)               | In-person interview<br>Measured BMI<br><br>Questionnaire and Profile of Mood States                            | N: Cognitive deficit, headache, memory issues, smell disorder, taste disorder                                  |
| Chudzik, M. <i>et al.</i> , 2022 [50]    | Poland                   | To analyse the prevalence of self-reported smell and/or taste disorders and to identify risk factors for the disease      | Cohort; 28.8 weeks starting 14 days after last COVID-19 symptom | Mixed population <sup>b</sup><br><i>n</i> = 2,218 (male = 1,410)<br><br>Age: 53.8 ± 13.5 years                         | Obesity ( <i>n</i> = 692)<br>Non-obesity ( <i>n</i> = 1,485)                                         | In-person interview<br>Measured BMI<br><br>Health questionnaire                                                | N: Smell and taste disorders                                                                                   |
| Desgranges, F. <i>et al.</i> , 2022 [52] | Switzerland              | To compare the prevalence of symptoms persisting for more than 3 months and to identify predictors of persistent symptoms | Cohort; 21.4 weeks after initial consultation (IQR: 17.2–29.1)  | Outpatient<br>Sample of interest / study sample<br><i>n</i> = 418/507 (male = 157)<br><br>Age: 41 (range: 31–54 years) | Obesity ( <i>n</i> = 72)<br>Overweight/obesity ( <i>n</i> = 189)<br>Healthy weight ( <i>n</i> = 229) | Electronic medical records<br>Telephone interviews<br>Self-reported BMI<br><br>Survey with predefined symptoms | N: Headache, loss of balance, memory issues, numbness, smell disorder, taste disorder<br>NP: sleep disturbance |
| Epsi, N.J. <i>et al.</i> , 2024 [55]     | United States of America | To improve the definition of PCC with a data-driven approach to phenotyping.                                              | Cohort 24 weeks post-infection                                  | Mixed population <sup>b</sup><br><i>n</i> = 1,988 (male = 1,201)                                                       | Obesity ( <i>n</i> = 710)<br>Overweight ( <i>n</i> = 842)<br>Normal weight ( <i>n</i> = 436)         | Electronic patient records and self-reported BMI<br>Online survey                                              | N: Smell and taste disorder                                                                                    |

| Author, Year                                          | Country   | Study aim                                                                                                       | Study design; Follow-up <sup>a</sup>                    | Study population                                                                     | Categories of nutritional status                                                          | Assessment type                                                                                                                                           | Main neurological (N) and neuropsychiatric (NP) symptoms evaluated                                                                                     |
|-------------------------------------------------------|-----------|-----------------------------------------------------------------------------------------------------------------|---------------------------------------------------------|--------------------------------------------------------------------------------------|-------------------------------------------------------------------------------------------|-----------------------------------------------------------------------------------------------------------------------------------------------------------|--------------------------------------------------------------------------------------------------------------------------------------------------------|
|                                                       |           |                                                                                                                 |                                                         | Age: 69,5% were between 18-44 years old                                              |                                                                                           | Survey with predefined symptoms                                                                                                                           |                                                                                                                                                        |
| Farhanah, N. <i>et al.</i> , 2022 [42]                | Indonesia | To determine persistent symptoms and evaluate quality of life in COVID-19 patients 3 months after discharge     | Cohort;<br>12 weeks after hospital discharge            | Hospitalized<br><i>n</i> = 104 (male = 55)<br>Age: 48.9 (range: 18–65 years)         | Excess weight ( <i>n</i> = 41)<br>Normal weight ( <i>n</i> = 63)                          | Electronic medical records<br>Telephone interviews<br>Reported symptoms                                                                                   | N: headache, smell disorder, sweating, taste disorder<br>NP: sleep disturbance                                                                         |
| Fernández-de- Las-Peñas, C. <i>et al.</i> , 2021 [51] | Spain     | To investigate the association of obesity with long-term post-COVID symptoms in hospitalized COVID-19 survivors | Case-control;<br>28.8 weeks after hospital discharge    | Hospitalized<br><i>n</i> = 264 (male = 159)<br>Age: 52.0 ± 14.5 years                | Obesity ( <i>n</i> = 88)<br>Non-obesity ( <i>n</i> = 176)                                 | Electronic medical records<br>Telephone interviews<br>List of symptoms<br>Hospital Anxiety and Depression Scale,<br>Pittsburgh Sleep Quality Index (PSQI) | N: Concentration issues, cognitive deficit, headache, memory issues, numbness, sleep disturbance, smell and taste disorders<br>NP: anxiety, depression |
| Gaur, R. <i>et al.</i> , 2022 [41]                    | India     | To assess the extent of disability following COVID-19 infection                                                 | Cross-sectional;<br>15.5 weeks after COVID-19 infection | Mixed population <sup>b</sup><br><i>n</i> = 97 (male = 61)<br>Age: 48.7 ± 15.6 years | Obesity ( <i>n</i> = 32)<br>Overweight ( <i>n</i> = 27)<br>Normal weight ( <i>n</i> = 38) | In-person interview<br>Measured BMI<br>Questionnaire                                                                                                      | N: Headache, vertigo<br>NP: Sleep disturbance                                                                                                          |
| Li, Z. <i>et al.</i> , 2023 <sup>d</sup> [32]         | China     | To investigate the mental health status of COVID-19                                                             | Cross-sectional;                                        | Hospitalized<br><i>n</i> = 535 (male = 216)                                          |                                                                                           | Self-reported survey<br>Measured BMI                                                                                                                      | N: Anxiety, depression<br>NP: Sleep disturbance                                                                                                        |

| Author, Year                                     | Country  | Study aim                                                                                                                  | Study design; Follow-up <sup>a</sup>                                     | Study population                                                                                                                | Categories of nutritional status                                                   | Assessment type                                                                             | Main neurological (N) and neuropsychiatric (NP) symptoms evaluated |
|--------------------------------------------------|----------|----------------------------------------------------------------------------------------------------------------------------|--------------------------------------------------------------------------|---------------------------------------------------------------------------------------------------------------------------------|------------------------------------------------------------------------------------|---------------------------------------------------------------------------------------------|--------------------------------------------------------------------|
|                                                  |          | survivors 1 year after discharge and reveal related risk factors                                                           | 52 weeks (12 months) after hospital discharge                            | Age: 50.8 ±14.4 years                                                                                                           | BMI ≥23 ( <i>n</i> = 221)<br>BMI 18.5–22.9 ( <i>n</i> = 295)                       | Questionnaire, General Anxiety Disorder-7 scale, Patient Health Questionnaire (PHQ)-9, PSQI |                                                                    |
| Miyazato, Y. <i>et al.</i> , 2022 [43]           | Japan    | To explore the factors involved in PCC development in a cohort of patients recovering from COVID-19 at a hospital in Japan | Cross-sectional;<br>35.5 weeks after symptom onset or COVID-19 diagnosis | Mixed population <sup>b</sup> ;<br><i>n</i> = 457 (male = 226)<br>Age: 47 (IQR: 39–55 years)                                    | BMI as continuous variable                                                         | Online survey<br>Self-reported BMI<br>Questionnaire with list of symptoms                   | N: Smell and taste disorders                                       |
| Moy, F.M. <i>et al.</i> , 2022 [40]              | Malaysia | To investigate mental health status in the form of depression among COVID-19 survivors and its associated factors          | Cross-sectional;<br>27.3 weeks after COVID-19 infection                  | Mixed population <sup>b</sup><br>Sample of interest / study sample<br><i>n</i> = 567/732 (male = 302)<br>Age: 40.2 ± 10.9 years | Overweight/obese ( <i>n</i> = 315)<br>Normal weight /underweight ( <i>n</i> = 246) | Online survey<br>Reported BMI<br>PHQ-9                                                      | NP: Depression                                                     |
| Shang, L. <i>et al.</i> , 2021 <sup>d</sup> [33] | China    | To determine whether obesity has a long-term impact on COVID-19 recovery                                                   | Cohort;<br>46.1 weeks after hospital discharge                           | Hospitalized<br><i>n</i> = 118 (male = 48)<br>Age: 53.0 (IQR: 44–61 years)                                                      | Obesity ( <i>n</i> = 53)<br>Non-obesity ( <i>n</i> = 65)                           | In-person interview<br>Measured BMI<br>Questionnaire                                        | N: Smell disorder<br>NP: sleep disturbance                         |

| Author, Year                                | Country | Study aim                                                                                                                                                                                 | Study design; Follow-up <sup>a</sup>                 | Study population                                                                                                                                               | Categories of nutritional status                                                       | Assessment type                                                                      | Main neurological (N) and neuropsychiatric (NP) symptoms evaluated                        |
|---------------------------------------------|---------|-------------------------------------------------------------------------------------------------------------------------------------------------------------------------------------------|------------------------------------------------------|----------------------------------------------------------------------------------------------------------------------------------------------------------------|----------------------------------------------------------------------------------------|--------------------------------------------------------------------------------------|-------------------------------------------------------------------------------------------|
| Sørensen, A.I.V., <i>et al.</i> , 2022 [45] | Denmark | To estimate the risk difference between COVID-19 positive and negative individuals; to evaluate the duration of symptoms; to explore the influence of risk factors on persistent symptoms | Cross-sectional;<br>38 weeks after COVID-19 test.    | Mixed population <sup>b</sup> (96% of outpatient)<br>Sample of interest / study sample<br>$n = 61,002/152,880$ (male = 25,172)<br>Age: 49.0 (IQR: 39–60 years) | Obese ( $n = 9,950$ )<br>Overweight ( $n = 19,264$ )<br>Normal weight ( $n = 25,285$ ) | Online survey and electronic records<br>Self-reported BMI<br>Web-based questionnaire | N: Headache, smell disorder, taste disorder, vertigo                                      |
| Van-Wijhe, M. <i>et al.</i> , 2022 [46]     | Denmark | To investigate the occurrence and risk factors for long-COVID symptoms and health-related quality of life                                                                                 | Cross-sectional;<br>12 weeks after positive PCR test | Outpatient<br>Sample of interest / study sample<br>$n = 742/7420$ (male = 245)<br>Age: $48.2 \pm 15.0$                                                         | Obesity ( $n = 148$ )<br>Overweight ( $n = 226$ )<br>Normal weight ( $n = 368$ )       | Electronic patient records and online survey<br>Questionnaire                        | N: Concentration issues, headache, memory issues, smell disorder, taste disorder, vertigo |
| Vassalini, P. <i>et al.</i> , 2021 [49]     | Italy   | To assess the prevalence of depressive symptoms and related risk factors at 3 months after hospitalization for COVID-19 infection                                                         | Cohort<br>12 weeks after hospital discharge          | Hospitalized<br>$n = 115$ (male = 62)<br>Age: 47 (IQR: 48–66 years)                                                                                            | Obesity ( $n = 5$ )<br>Non-obesity ( $n = 110$ )                                       | Electronic medical records and telephone interviews<br>PHQ-9                         | NP: Depression                                                                            |
| Whitaker, M. <i>et al.</i> , 2022 [47]      | England | To estimate symptom prevalence; to investigate co-                                                                                                                                        | Cross-sectional;                                     | Mixed population <sup>b</sup><br>Sample of interest / study sample                                                                                             | Obesity ( $n = 18,892$ )<br>Overweight ( $n = 27,986$ )                                | Survey (online/telephone)<br>Self-reported BMI                                       | N: Headache, memory issues, numbness, smell disorder, taste disorder, vertigo             |

| Author, Year | Country | Study aim                                                                  | Study design; Follow-up <sup>a</sup> | Study population                                                                            | Categories of nutritional status   | Assessment type                          | Main neurological (N) and neuropsychiatric (NP) symptoms evaluated |
|--------------|---------|----------------------------------------------------------------------------|--------------------------------------|---------------------------------------------------------------------------------------------|------------------------------------|------------------------------------------|--------------------------------------------------------------------|
|              |         | occurrence of symptoms and assess risk factors for persistence of symptoms | 12 weeks after symptom onset         | <i>n</i> = 78,566/606,434 (male = 37,600)<br>Age: 80% of sample between 25 and 65 years old | Normal weight ( <i>n</i> = 30,639) | Questionnaire and self-reported symptoms | NP: sleep disturbance                                              |

256 BMI: body mass index; PCR: polymerase chain reaction; IQR: interquartile range.

257 <sup>a</sup> Mean or median of follow-up time, in weeks;

258 <sup>b</sup> Hospitalized and outpatient;

259 <sup>c</sup> Argentina, Brazil, Chile, Dominican Republic, Ecuador, Mexico, Panama, Paraguay, and Peru;

260 <sup>d</sup> Different cut-off values were used to define excess weight and obesity in Asian populations.

261

262

263

264

265

266

267



268 Half of the studies[32, 33, 40, 43, 46, 50–52, 55] tested for differences in the  
269 prevalence or risk of developing PCC neurological and neuropsychiatric symptoms based  
270 on to nutritional status. One study found that BMI was inversely associated with the risk  
271 of developing smell and taste disorders[43]. Positive associations between EW and  
272 anxiety[32], depression[32, 40], and sleep disturbance[51, 52] were also reported, with  
273 obesity being independently associated with sleep disturbance[51]. Table 2 displays data  
274 on the frequency and risk of developing neurological and neuropsychiatric symptoms of  
275 PCC from studies that examined differences between exposure and control groups. Other  
276 studies[41, 42, 44, 45, 47–49, 53, 54] did not test for differences in the prevalence or risk  
277 of specific persistent neuropsychiatric symptoms. Data on symptom frequency by  
278 nutritional status are available in the supporting information (S2 Table).

279

280

281

282

283

284

285

286

287

288

289

290

291

292

**Table 2. Frequency of neuropsychiatric symptoms related to post-COVID condition and the risk of their development in included studies.**

| Author, year                             | Frequency (%) of PCC Symptoms according to nutritional status |                             | Significantly higher frequency of symptoms among exposure groups?<br>(Yes / No) | Effect measure of nutritional status on the risk/protection of developing a PCC symptom<br>aOR (95%CI) | Exposure increased the risk of symptoms?<br>(Yes / No) |     |
|------------------------------------------|---------------------------------------------------------------|-----------------------------|---------------------------------------------------------------------------------|--------------------------------------------------------------------------------------------------------|--------------------------------------------------------|-----|
|                                          | Excess Weight versus Exposure groups                          | Normal Weight Control group |                                                                                 |                                                                                                        |                                                        |     |
| Desgranges, F. <i>et al.</i> , 2022      | Smell and taste disorders                                     |                             |                                                                                 | 1.01 (0.61-1.67); $p=0.96$                                                                             | No                                                     |     |
|                                          | Headache                                                      |                             |                                                                                 | 0.79 (0.48-1.75); $p=0.79$                                                                             | No                                                     |     |
|                                          | Loss of balance                                               | NA                          | NA                                                                              | NA                                                                                                     | 1.46 (0.35-6.09); $p=0.61$                             | No  |
|                                          | Memory issues                                                 |                             |                                                                                 |                                                                                                        | 1.79 (0.93-3.44); $p=0.08$                             | No  |
|                                          | Numbness                                                      |                             |                                                                                 |                                                                                                        | 2.74 (0.79-9.50); $p=0.11$                             | No  |
|                                          | Sleep disturbance                                             |                             |                                                                                 |                                                                                                        | 2.08 (1.03-4.21); $p=0.04^*$                           | Yes |
| Epsi, N.J. <i>et al.</i> , 2024          | Smell and taste disorder                                      | 0.01                        | 0.02                                                                            | No                                                                                                     | 0.89 (0.37–2.12)                                       | No  |
| Li, Z. <i>et al.</i> , 2023 <sup>a</sup> | Anxiety                                                       | 16.3                        | 13.8; $p=0.000^*$                                                               | Yes                                                                                                    | NA                                                     | NA  |
|                                          | Depression                                                    | 21.7                        | 19.0; $p=0.052^*$                                                               | No                                                                                                     |                                                        |     |
|                                          | Sleep disturbance                                             | 51.1                        | 43.3; $p=0.018^*$                                                               | Yes                                                                                                    |                                                        |     |
| Miyazato, Y. <i>et al.</i> , 2022        | Smell disorder                                                | NA                          | NA                                                                              | NA                                                                                                     | 0.94 (0.89-0.99); $p=0.014^*$                          | Yes |
|                                          | Taste disorder                                                |                             |                                                                                 |                                                                                                        | 0.93 (0.88-0.98); $p=0.012^*$                          | Yes |
| Moy, F.M. <i>et al.</i> , 2022           | Depression                                                    | 51.7                        | 42.3; $p=0.026^*$                                                               | Yes                                                                                                    | 1.83 (1.18-2.82)                                       | Yes |
| Van-Wijhe, M. <i>et al.</i> , 2022       | Concentration issues                                          |                             |                                                                                 |                                                                                                        | 1.01 (0.70-1.47)                                       | No  |
|                                          | Headache                                                      |                             |                                                                                 |                                                                                                        | 1.09 (0.75-1.58)                                       | No  |
|                                          | Memory impairment                                             |                             |                                                                                 |                                                                                                        | 0.94 (0.62-1.42)                                       | No  |
|                                          | Taste disorder                                                | NA                          | NA                                                                              | NA                                                                                                     | 0.85 (0.61-1.32)                                       | No  |
|                                          | Smell disorder                                                |                             |                                                                                 |                                                                                                        | 0.72 (0.45-1.05)                                       | No  |
|                                          | Vertigo                                                       |                             |                                                                                 |                                                                                                        | 0.95 (0.64-1.42)                                       | No  |

|                                                 | Obesity versus Non-obesity |               | (Yes / No)             | OR (95%CI) | (Yes / No)                         |     |
|-------------------------------------------------|----------------------------|---------------|------------------------|------------|------------------------------------|-----|
|                                                 | Exposure groups            | Control group |                        |            |                                    |     |
| Chudzik, M. <i>et al.</i> , 2022                | Smell and taste disorder   | 3.1           | 5.1                    | No         | 0.65 (0.35-1.22); <i>p</i> =0.185  | No  |
| Epsi, N.J. <i>et al.</i> , 2024                 | Smell and taste disorder   | 0.01          | 0.02                   | No         | 0.76 (.29–1.99)                    | No  |
| Fernández-de-las-Peñas, C. <i>et al.</i> , 2021 | Ageusia                    | 8.0           | 6.8                    | Yes        | NA                                 | NA  |
|                                                 | Anosmia                    | 2.3           | 6.8                    | No         | NA                                 | NA  |
|                                                 | Anxiety                    | 15.9          | 9.7                    | Yes        | 1.75 (0.82-3.72); <i>p</i> = 0.146 | No  |
|                                                 | Cognitive deficit          | 9.1           | 6.8                    | Yes        | NA                                 | NA  |
|                                                 | Concentration issues       | 13.6          | 9.1                    | Yes        | NA                                 | NA  |
|                                                 | Depression                 | 13.6          | 15.9                   | No         | 0.83 (0.40-1.73); <i>p</i> = 0.628 | No  |
|                                                 | Headache                   | 8.0           | 5.7                    | Yes        | NA                                 | NA  |
|                                                 | Memory impairment          | 18.2          | 14.8                   | Yes        | NA                                 | NA  |
|                                                 | Sleep disturbance          | 45.5          | 25.6                   | Yes        | 2.10 (1.13-3.83); <i>p</i> =0.020* | Yes |
| Shang, L. <i>et al.</i> , 2021 <sup>a</sup>     | Sleep disturbance          | 39.6          | 44.6; <i>p</i> = 0.590 | No         | NA                                 | NA  |
|                                                 | Smell disorder             | 7.5           | 7.7; <i>p</i> = 0.970  | No         |                                    |     |
| Van-Wijhe, M. <i>et al.</i> , 2022              | Concentration issues       |               |                        |            | 0.96 (0.62-1.49)                   | No  |
|                                                 | Headache                   |               |                        |            | 1.06 (0.69-1.65)                   | No  |
|                                                 | Memory impairment          |               |                        |            | 0.92 (0.56-1.50)                   | No  |
|                                                 | Taste disorder             | NA            | NA                     | NA         | 1.00 (0.65-1.55)                   | No  |
|                                                 | Smell disorder             |               |                        |            | 0.83 (0.53-1.55)                   | No  |
|                                                 | Vertigo                    |               |                        |            | 0.90 (0.56-1.45)                   | No  |

\*Statistically significant; NA: non-available information; excess-weight group (BMI  $\geq 25$  kg/m<sup>2</sup>); normal-weight group (BMI  $< 25$  kg/m<sup>2</sup>); obesity group (BMI  $\geq 30$  kg/m<sup>2</sup>); non-obesity group (BMI  $< 30$  kg/m<sup>2</sup>). <sup>a</sup> Different cut-off values were used to define excess weight and obesity in Asian populations (excess weight  $\geq 23$ kg/m<sup>2</sup>; obesity  $\geq 25$  kg/m<sup>2</sup>).

## 293 **Excess Weight and the Risk of Neuropsychiatric Symptoms**

294 We assessed the risk ratios (RRs) for the EW group (Figs 3a and 3b). Excess  
295 weight significantly increased the risk of depression (RR = 1.21; 95% CI: 1.03–1.42;  $I^2 =$   
296 0.00), headache (RR = 1.21; 95% CI: 1.09–1.35;  $I^2 = 41.3\%$ ), memory issues (RR = 1.43;  
297 95% CI: 1.24–1.65;  $I^2 = 0.00$ ), numbness (RR = 1.37; 95% CI: 1.24–1.51;  $I^2 = 0.00$ ), sleep  
298 disturbance (RR = 1.31; 95% CI: 1.16–1.48;  $I^2 = 17.83$ ), taste disorder (RR = 1.11; 95%  
299 CI: 1.00–1.23;  $I^2 = 53.46$ ), and vertigo (RR = 1.21; 95% CI: 1.04–1.41;  $I^2 = 0.00$ ). No  
300 significant association was found between EW and other evaluated symptoms (S1 Figs  
301 1a and 1b).

302

303 **Fig 3a. Forest plots of excess weight and risk ratio (RR) for neurological and**  
304 **neuropsychiatric symptoms.** <sup>a</sup> Applied a different cut-off of BMI. Excess weight > 23kg/m<sup>2</sup>.

305 **Fig 3b; Forest plots of excess weight and risk ratio (RR) for neurological and**  
306 **neuropsychiatric symptoms (Continuation).**

307

308 Four studies employed multivariate logistic regression and reported the risk of  
309 developing headache, smell disorder, memory impairment and taste disorder. These data  
310 were included in the meta-analysis. Pooled results revealed a significant association  
311 indicating that the risk of developing taste disorder was inversely associated with BMI  
312 (OR 0.93; 95%CI 0.88-0.98;  $I^2=0,00$ ). No significant associations were found for other  
313 evaluated symptoms (S2 Fig 2).

## 314 **Obesity and the Risk of Neuropsychiatric Symptoms**

315 Our pooled risk analysis for obesity and neurological and neuropsychiatric  
316 symptoms (Figs 4a and 4b) showed that individuals with obesity are at significantly

317 higher risk than those with normal weight or overweight (non-obesity control group) for  
318 a range of neurological symptoms: headache (RR = 1.41; 95% CI: 1.34–1.49;  $I^2 = 3.39$ );  
319 numbness (RR = 1.61; 95% CI: 1.46–1.78;  $I^2 = 0.00$ ); smell disorder (RR = 1.15; 95%  
320 CI: 1.09–1.21;  $I^2 = 7.55$ ); taste disorder (RR = 1.21; 95% CI: 1.07–1.36;  $I^2 = 63.57$ ); and  
321 vertigo (RR = 1.44; 95% CI: 1.35–1.53;  $I^2 = 0.00$ ). No statistically significant association  
322 was found between obesity and the risk of developing PCC-related neuropsychiatric  
323 symptoms (S1 Fig 1b).

324

325 **Fig 4a. Forest plot of obesity and risk ratio (RR) for neurological and**  
326 **neuropsychiatric symptoms.** <sup>a</sup> Applied a different BMI cut-off (obesity >25 kg/m<sup>2</sup>).

327 **Fig 4b. Forest plot of obesity and risk ratio (RR) for neurological and**  
328 **neuropsychiatric symptoms (continuation)**

329

330 Substantial heterogeneity was observed in our meta-analysis for the non-  
331 significant association of obesity and anxiety ( $I^2 = 70.5\%$ ) and sleep disorder ( $I^2 =$   
332  $61.94\%$ ) as well as for the statistically significant association between obesity and taste  
333 disorder ( $I^2 = 69.5\%$ ). Meanwhile, no statistically significant heterogeneity was observed  
334 in other analyses where obesity was the exposure condition. Subgroup analyses could not  
335 be performed due to an insufficient number of studies evaluating the same outcome  
336 according to nutritional status.

### 337 **Risk-of-bias Assessment and Publication Bias**

338 We assessed the risk of bias for each effect measure (frequency and OR). Results  
339 for studies reporting the frequency of PCC symptoms are presented in Fig 5; while  
340 findings for studies reporting OR are displayed in Supporting Information (S3 Fig 3).  
341 Among the 18 studies evaluated, seven were judged to have a high risk of bias due to self-

342 reported exposure data[40, 43–45, 47, 52, 55]. The ROBINS-E tool indicated that no  
343 further evaluation of a study was required for studies with inappropriate measurement of  
344 exposure or outcome; therefore, this tool was applied only to the remaining 11 studies[32,  
345 33, 41, 42, 46, 48–51, 53, 54].

346 **Fig 5: Summary plot and traffic light plot illustrating the risk of bias in the included**  
347 **studies, assessed using the ROBINS-E tool.**

348

349 The domain most affecting the assessment was control for confounders (Domain  
350 1 [D1]). Few studies employed appropriate designs (e.g., randomization or matching)[46,  
351 51, 54] or analytical methods (e.g., stratification)[32, 48–50]; only one study had an  
352 overall low risk of bias[50]. Concerns were also noted regarding exposure measurement  
353 (Domain 2 [D2]), particularly when data were obtained from electronic medical records  
354 without reporting time-related information[51]. Visual assessment of the funnel plots did  
355 not imply asymmetry.

356 Findings from the GRADE assessment are presented in Table 3 and supporting  
357 information (S3 Table). The quality of evidence was downgraded from high to very low  
358 for three outcomes (headache, taste disorder, and vertigo) due to high risk of bias,  
359 imprecision of results, and publication bias. For the other outcomes, the quality of  
360 evidence was rated as low, having been downgraded from high due to risk of bias and  
361 publication bias.

362

363

**Table 3. Assessment of the overall certainty of the evidence.**

| Certainty assessment                                                                                |                        |                      |               |                          |                      |                                                  | No of patients    |                   | Effect                           |                                                      | Certainty                         |
|-----------------------------------------------------------------------------------------------------|------------------------|----------------------|---------------|--------------------------|----------------------|--------------------------------------------------|-------------------|-------------------|----------------------------------|------------------------------------------------------|-----------------------------------|
| No of studies                                                                                       | Study design           | Risk of bias         | Inconsistency | Indirectness             | Imprecision          | Other considerations                             | Excess weight     | normal weight     | Relative (95% CI)                | Absolute (95% CI)                                    |                                   |
| <b>Depression (follow-up: range 27 to 52 weeks; assessed with: Scales)</b>                          |                        |                      |               |                          |                      |                                                  |                   |                   |                                  |                                                      |                                   |
| 2                                                                                                   | non-randomised studies | serious <sup>a</sup> | not serious   | not serious <sup>a</sup> | not serious          | publication bias strongly suspected <sup>b</sup> | 211/536 (39.4%)   | 160/541 (29.6%)   | <b>RR 1.21</b><br>(1.03 to 1.42) | <b>62 more per 1000</b><br>(from 9 more to 124 more) | ⊕⊕○○<br>Low <sup>a,b</sup>        |
| <b>Sleep disturbance (follow-up: range 12 to 52 weeks; assessed with: Questionnaire and scales)</b> |                        |                      |               |                          |                      |                                                  |                   |                   |                                  |                                                      |                                   |
| 6                                                                                                   | non-randomised studies | serious <sup>a</sup> | not serious   | not serious              | not serious          | publication bias strongly suspected <sup>b</sup> | 3861/47449 (8.1%) | 1958/31420 (6.2%) | <b>RR 1.31</b><br>(1.16 to 1.48) | <b>19 more per 1000</b><br>(from 10 more to 30 more) | ⊕⊕○○<br>Low <sup>a,b</sup>        |
| <b>Headache (follow-up: range 12 to 387 weeks; assessed with: Questionnaire and self-reported)</b>  |                        |                      |               |                          |                      |                                                  |                   |                   |                                  |                                                      |                                   |
| 7                                                                                                   | non-randomised studies | serious <sup>a</sup> | not serious   | not serious              | serious <sup>c</sup> | publication bias strongly suspected <sup>b</sup> | 4475/76399 (5.9%) | 2773/56352 (4.9%) | <b>RR 1.15</b><br>(1.07 to 1.22) | <b>7 more per 1000</b><br>(from 3 more to 11 more)   | ⊕○○○<br>Very low <sup>a,b,c</sup> |
| <b>Memory issues (follow-up: range 12 to 32 weeks; assessed with: Questionnaire)</b>                |                        |                      |               |                          |                      |                                                  |                   |                   |                                  |                                                      |                                   |
| 3                                                                                                   | non-randomised studies | serious <sup>a</sup> | not serious   | not serious              | not serious          | publication bias strongly suspected <sup>b</sup> | 563/7041 (8.0%)   | 267/4831 (5.5%)   | <b>RR 1.43</b><br>(1.24 to 1.65) | <b>24 more per 1000</b><br>(from 13 more to 36 more) | ⊕⊕○○<br>Low <sup>a,b</sup>        |
| <b>Numbness (follow-up: range 12 to 32 weeks; assessed with: Questionnaire)</b>                     |                        |                      |               |                          |                      |                                                  |                   |                   |                                  |                                                      |                                   |
| 3                                                                                                   | non-randomised studies | serious <sup>a</sup> | not serious   | not serious              | not serious          | publication bias strongly suspected <sup>b</sup> | 1141/47075 (2.4%) | 550/30959 (1.8%)  | <b>RR 1.37</b><br>(1.24 to 1.51) | <b>7 more per 1000</b><br>(from 4 more to 9 more)    | ⊕⊕○○<br>Low <sup>a,b</sup>        |

| Certainty assessment |              |              |               |              |             |                      | No of patients |               | Effect            |                   | Certainty |
|----------------------|--------------|--------------|---------------|--------------|-------------|----------------------|----------------|---------------|-------------------|-------------------|-----------|
| No of studies        | Study design | Risk of bias | Inconsistency | Indirectness | Imprecision | Other considerations | Excess weight  | normal weight | Relative (95% CI) | Absolute (95% CI) |           |

**Taste disorder (follow-up: range 12 to 38 weeks; assessed with: Questionnaire and self-reported)**

|   |                        |                      |             |             |                        |                                                  |                          |                          |                                  |                                                     |                                   |
|---|------------------------|----------------------|-------------|-------------|------------------------|--------------------------------------------------|--------------------------|--------------------------|----------------------------------|-----------------------------------------------------|-----------------------------------|
| 5 | non-randomised studies | serious <sup>a</sup> | not serious | not serious | serious <sup>d,e</sup> | publication bias strongly suspected <sup>b</sup> | 4914/76<br>330<br>(6.4%) | 3445/56<br>307<br>(6.1%) | <b>RR 1.11</b><br>(1.00 to 1.23) | <b>7 more per 1000</b><br>(from 0 fewer to 14 more) | ⊕○○○<br>Very low <sup>a,b,d</sup> |
|---|------------------------|----------------------|-------------|-------------|------------------------|--------------------------------------------------|--------------------------|--------------------------|----------------------------------|-----------------------------------------------------|-----------------------------------|

**Vertigo (follow-up: range 12 to 38 weeks; assessed with: Questionnaire and self-reported)**

|   |                        |                      |             |             |                      |                                                  |                          |                          |                                  |                                                    |                                   |
|---|------------------------|----------------------|-------------|-------------|----------------------|--------------------------------------------------|--------------------------|--------------------------|----------------------------------|----------------------------------------------------|-----------------------------------|
| 5 | non-randomised studies | serious <sup>a</sup> | not serious | not serious | serious <sup>f</sup> | publication bias strongly suspected <sup>b</sup> | 2795/76<br>348<br>(3.7%) | 1764/56<br>282<br>(3.1%) | <b>RR 1.21</b><br>(1.04 to 1.41) | <b>7 more per 1000</b><br>(from 1 more to 13 more) | ⊕○○○<br>Very low <sup>a,b,c</sup> |
|---|------------------------|----------------------|-------------|-------------|----------------------|--------------------------------------------------|--------------------------|--------------------------|----------------------------------|----------------------------------------------------|-----------------------------------|

**CI:** confidence interval; **RR:** risk ratio; a. The risk of bias of included studies is related to measurement of exposure (self-reported) or confounders control, especially regarding severity of COVID-19 acute phase; b. There are less than 10 studies included in the meta-analysis therefore we were unable to evaluate publication bias; c. Meta-analysis showed moderate heterogeneity among included studies ( $I^2 = 41\%$ ); d. The quality of evidence was downgraded from high due to the high risk of bias of included studies; e. Meta-analysis showed moderate heterogeneity among included studies ( $I^2 = 53\%$ ); f. Meta-analysis showed moderate heterogeneity among included studies ( $I^2 = 59.5\%$ ).



## 364 **Discussion**

365           Although it has been suggested that individuals with increased BMI are at higher  
366 risk of PCC, the associations between EW and specific PCC related neurological and  
367 neuropsychiatric symptoms remained unclear. Our review reveals that EW is significantly  
368 associated with a range of persistent and PCC symptoms, including headache, vertigo,  
369 smell and taste disorder, sleep disturbance and depression. These findings suggest that  
370 EW markedly increases the risk of developing these symptoms that persist for more than  
371 12 weeks after COVID-19 onset. Moreover, this study is opportune as we transition into  
372 the post-pandemic period facing the challenges of managing the co-occurrence of  
373 pandemics, including overweight/obesity, mental health issues, and the burden of PCC.

374           Increased BMI has been identified as a determinant of adverse outcomes during  
375 both the acute and chronic phases of COVID-19[16, 24, 26]. This contrasts with the role  
376 of sex in the disease course since the pattern of acute phase symptoms by sex is distinct  
377 from that of PCC, which tends to affect more females[18, 56]. Additionally, the chronic  
378 phase of COVID-19's has been variously defined, with some studies indicating symptoms  
379 lasting for at least 4 weeks[10] and others extending to more than 12 weeks[5, 6].  
380 Differentiating these time frames is crucial to distinguish between acute illness and  
381 potential sequelae of irreversible tissue damage, which may present with varying degrees  
382 of impairment[57]. In our review, we used the cut-off criterion to ensure that we focused  
383 on long-term or chronic outcomes of COVID-19. The mean follow-up time from illness  
384 onset in the included studies was 25.8 weeks (ranging from 12 to 52 weeks). A large  
385 systematic review[2] evaluated the prevalence of persistent symptoms among COVID-19  
386 survivors at different follow-up periods. It identified sleep disorder and concentration  
387 difficulties as the most common symptoms at 3–6 months (24%, 95% CI: 8%–44%; 22%,  
388 95% CI: 15%–31%, respectively), with sleep disorder being most prevalent at over 12

389 months. However, unlike our results, this review had a high degree of between-study  
390 heterogeneity and did not include BMI in subgroups analysis.

391 Long-term neurological symptoms significantly decrease the quality of life for  
392 individuals, a situation that might be exacerbated by a pre-existing comorbidities[58].  
393 Moreover, symptoms related to comorbidities often overlap with those of PCC, leading  
394 individuals with obesity to attribute their symptoms to their metabolic disease rather than  
395 to persistent manifestations of COVID-19[59, 60]. Additionally, overweight individuals  
396 also report health complaints, including headache and sleeplessness, associated to their  
397 subclinical disease state also known as suboptimal health status, which can be exacerbated  
398 by PCC symptoms[20]. The co-occurrence of these complex conditions can have  
399 deleterious effects, impairing people's daily functioning and increasing the demand on  
400 healthcare systems. Our results highlight a significantly increased risk for persistent  
401 headache, vertigo, numbness and taste disorder in individuals with EW or obesity. This  
402 underscores the role of excessive body weight (fat deposits) in PCC. It is worth noting  
403 that patients with PCC have reported that head pain worsens with physical exercise while  
404 a decrease in physical activity coupled with increase in sedentary behaviour are generally  
405 known to contribute to weight gain[61][62]. Moreover, taste disorders may influence  
406 unhealthy weight-related behaviours, such as consuming more palatable, ultra-processed  
407 foods high in salt, sugar, and additives. These foods can further impair gustatory function  
408 and exacerbate unhealthy symptoms[63, 64]. Vertigo which impairs daily functioning by  
409 increasing the risk of falls may also be associated with depression[65, 66]. Therefore,  
410 healthcare systems and public policies should focus on multidisciplinary rehabilitation  
411 services to address the long-term impacts of COVID-19 on survivors, specifically through  
412 concomitant personalized management of weight, neurological and neuropsychiatric  
413 issues.

414           The high prevalence of persistent complex concurrent symptoms may create a  
415 vicious circle between physical and neuropsychiatric symptoms, increasing the risk for  
416 depression[67–70]. A significant positive association between obesity and depressed  
417 mood has been observed across multiple COVID-19 periods, similar to findings in other  
418 coronavirus outbreaks[9, 14, 62]. During the COVID-19 pandemic, a systematic review  
419 of longitudinal studies identified obesity/overweight as a risk factor for depression  
420 (pooled RR = 1.2; 95% CI: 1.11-1.31). However, no significant association was found  
421 when obesity/overweight was self-reported (pooled RR = 1.03; 95% CI: 0.99–1.26)[71].  
422 In this study, we observed a heightened risk of persistent depression among individuals  
423 with EW compared with those with normal weight. This findings aligns with Aminian *et*  
424 *al.*[72] who reported that the need for diagnostic test to assess neuropsychiatric problems  
425 (a *proxy* for symptoms) was significantly higher in individuals with increased BMI  
426 compared to those with normal weight. Although our pooled RR for EW and depression  
427 included data from two studies conducted with Asian populations[32, 40] featuring  
428 different BMI assessments (measured and self-reported) and BMI cut-offs (excess weight  
429 defined as BMI  $\geq 23\text{kg/m}^2$  and obesity as BMI  $\geq 25\text{kg/m}^2$ ), both studies used a validated  
430 depression scale (PHQ-9), and the results were not heterogeneous.

431           It remains uncertain whether neurological and neuropsychiatric manifestations  
432 related to PCC are directly attributable to the virus itself or if they develop indirectly  
433 (such as, through an immune response or medical therapy). These symptoms may also  
434 involve both the central and peripheral nervous systems[14]. Additionally, the role of EW  
435 in the progression of COVID-19 is not fully understood, though it may be linked to an  
436 exaggerated inflammatory response or shared pre-existing genetic factors that these  
437 conditions share[73–75]. EW is also a recognized risk factor for various chronic  
438 conditions and the number of pre-existing comorbidities has been associated to the

439 development of PCC symptoms up to two years after COVID-19 onset, in both  
440 hospitalized and non-hospitalized patients[76]. Our results underscore the importance of  
441 identifying at-risk individuals and highlight the need for timely personalized interventions  
442 for COVID-19 survivors. These findings could inform the development of predictive and  
443 preventive management plans for future waves of SARS-CoV-2 or other epidemics.

444 Our quality assessment results indicate that the included studies suffer from  
445 methodological issues, particularly in measuring exposure. Studies that classified  
446 individuals' nutritional status based on self-reported data were found to have a high risk  
447 of bias, which contributed to downgrade in the overall quality of evidence of evaluated  
448 for the evaluated symptoms. During the height of the pandemic, online health surveys  
449 were often used when other research methods were infeasible[77]. However, significant  
450 issues can also arise from self-reported symptoms in studies that did not employ  
451 structured questionnaire or validated scales. Although screening tools have been proposed  
452 to identify people with PCC they often do not consider neuropsychiatric symptoms[78]  
453 or important cognitive symptoms[79] that significantly affect individuals' quality of life.  
454 The observed moderate heterogeneity among studies evaluating headache, taste disorder  
455 and vertigo has led to imprecision in the results and the limited number of studies included  
456 in meta-analysis unable the assessment of publication bias, further contributing to  
457 downgrade of the overall quality of evidence for those outcomes from high to very low.

458 It is important to acknowledge certain limitations when interpreting the findings  
459 of our research. Most of the included studies were cross-sectional which limits the ability  
460 to determine cause and effect relationships. The inconsistency in naming PCC symptoms  
461 among studies resulted in a relatively low number of studies reporting the same symptom  
462 which also precluded subgroup comparisons between hospitalized and outpatient  
463 populations. We included studies that used non-validated questionnaires to assess

464 symptoms, as it was necessary given that PCC is an emerging condition and validated  
465 screening tools have yet to be developed. Although the cut-off for study inclusion  
466 regarding time to follow-up (i.e., >12 weeks) allowed us to track long-term outcomes  
467 from COVID-19 and address a gap in the literature, the follow-up period ranged from 12  
468 to 52 weeks post-infection, the varying risk of PCC symptoms throughout different  
469 follow-up periods was not investigated in subgroup analysis due to limited number of  
470 studies. Additionally, the inclusion of both obesity and non-obesity as comparisons  
471 groups led to the interchange of overweight individuals between exposure and control  
472 groups. Nevertheless, defining EW and obesity as exposure groups was crucial given the  
473 syndemic context. This approach enabled the evaluation of the risk of developing  
474 persistent symptoms among different levels of excessive fat and highlighted that both  
475 suboptimal health status (overweight) and illness (obesity) predisposed individuals to  
476 PCC-related neuro-symptoms. However, the inherent differences among these groups  
477 should be considered in health, disease prevention and diagnoses. Furthermore, the issues  
478 related to body fat assessment should be noted as BMI remains the most widely used  
479 screening tool for measuring adiposity. Although it is a simple and non-invasive measure  
480 often related to the gold standard fat assessment BMI does not accounts for the types or  
481 distribution of adipose tissue, nor does it for age and ethnic backgrounds[80]. Future  
482 research should focus on longitudinal evaluation of COVID-19 survivors incorporating  
483 objective assessment of symptoms and adiposity.

484         Despite these limitations, our review has several scientific and clinical strengths.  
485 Notably, the number of investigated outcomes allowed for a pioneering evaluation of the  
486 association of EW with both the physical and psychological long-term manifestations of  
487 COVID-19. Additionally, the comprehensive definition of PCC that we applied during  
488 our article search (to account for varied terminology), along with the inclusion of each

489 neurological and neuropsychiatric symptom specified in our search strategy, ensured a  
490 thorough screening process. We also underscored the importance of addressing EW as a  
491 global health concern, given its interplay with neurological and neuropsychiatric  
492 manifestations, and infectious diseases such as COVID-19. The management of EW  
493 should be considered in the treatment of neurological and neuropsychiatric symptoms due  
494 to the significant impact that these combined conditions have on individuals' health.

495

## 496 **Conclusions**

497 Our systematic review and meta-analysis demonstrate that EW is significantly  
498 associated with an increased risk of developing post-COVID-19 neurological and  
499 neuropsychiatric symptoms, including headache, memory issues, numbness, smell and  
500 taste disorders, vertigo, depression, and sleep disturbance. These findings underscore the  
501 need for developing multidisciplinary rehabilitative strategies tailored to individual needs  
502 to improve care management and support the overall health of affected individuals. Our  
503 results provide evidence-based guidance for healthcare professionals and policymakers  
504 in managing PCC, and further support ongoing global efforts to understand its underlying  
505 mechanisms, epidemiology, and identification.

506

## 507 **Acknowledgements:**

508 We would like to thank the researchers who shared information and enabled more precise  
509 results in this study. We would also like to acknowledge students and collaborators of the  
510 PENSA research group at the University of Brasília and the Centre for Precision Health  
511 at Edith Cowan University for their support.

512

## 513 References

- 514 [1] Blumenthal D, Fowler EJ, Abrams M, Collins SR. Covid-19 — Implications for  
515 the Health Care System. *N Engl J Med* 2020; 383: 1483–1488.
- 516 [2] Alkodaymi MS, Omrani OA, Fawzy NA, Shaar BA, Almamlouk R, Riaz M, et al.  
517 Prevalence of post-acute COVID-19 syndrome symptoms at different follow-up  
518 periods: a systematic review and meta-analysis. *Clin Microbiol Infect* 2022; 28:  
519 657–666.
- 520 [3] Nalbandian A, Sehgal K, Gupta A, Madhavan MV, McGroder C, Stevens JS, et al.  
521 Post-acute COVID-19 syndrome. *Nat Med* 2021; 27: 601–615.
- 522 [4] Carfi A, Bernabei R, Landi F. Persistent Symptoms in Patients After Acute  
523 COVID-19. *JAMA* 2020; 324: 603–605.
- 524 [5] WHO. A clinical case definition of post-COVID-19 condition by a Delphi  
525 consensus - The Lancet Infectious Diseases,  
526 [https://www.thelancet.com/journals/laninf/article/PIIS1473-3099\(21\)00703-](https://www.thelancet.com/journals/laninf/article/PIIS1473-3099(21)00703-9/fulltext)  
527 [9/fulltext](https://www.thelancet.com/journals/laninf/article/PIIS1473-3099(21)00703-9/fulltext) (accessed 15 October 2023).
- 528 [6] NICE NI for H and C of E. 1 Identification | COVID-19 rapid guideline: managing  
529 the long-term effects of COVID-19 | Guidance | NICE,  
530 <https://www.nice.org.uk/guidance/ng188/chapter/1-Identification> (2020, accessed  
531 20 June 2024).
- 532 [7] Greenhalgh T, Knight M, A’Court C, Buxton M, Husain L. Management of post-  
533 acute covid-19 in primary care. *BMJ* 2020; 370: m3026.
- 534 [8] Davis HE, McCorkell L, Vogel JM, Topol EJ. Long COVID: major findings,  
535 mechanisms and recommendations. *Nat Rev Microbiol* 2023; 21: 133–146.
- 536 [9] Rogers JP, Chesney E, Oliver D, Pollak TA, McGuire P, Fusar-Poli P, et al.  
537 Psychiatric and neuropsychiatric presentations associated with severe coronavirus  
538 infections: a systematic review and meta-analysis with comparison to the COVID-  
539 19 pandemic. *Lancet Psychiatry* 2020; 7: 611–627.
- 540 [10] Al-Aly Z, Xie Y, Bowe B. High-dimensional characterization of post-acute  
541 sequelae of COVID-19. *Nature* 2021; 594: 259–264.
- 542 [11] Fanshawe JB, Sargent BF, Badenoch JB, Saini A, Watson CJ, Pokrovskaya A, et  
543 al. Cognitive domains affected post-COVID-19; a systematic review and meta-  
544 analysis. *Eur J Neurol*; n/a: e16181.
- 545 [12] Badenoch JB, Rengasamy ER, Watson C, Jansen K, Chakraborty S, Sundaram RD,  
546 et al. Persistent neuropsychiatric symptoms after COVID-19: a systematic review  
547 and meta-analysis. *Brain Commun* 2022; 4: fcab297.
- 548 [13] Malik P, Patel K, Pinto C, Jaiswal R, Tirupathi R, Pillai S, et al. Post-acute  
549 COVID-19 syndrome (PCS) and health-related quality of life (HRQoL)—A  
550 systematic review and meta-analysis. *J Med Virol* 2022; 94: 253–262.

- 551 [14] Pilotto A, Cristillo V, Cotti Piccinelli S, Zoppi N, Bonzi G, Sattin D, et al. Long-  
552 term neurological manifestations of COVID-19: prevalence and predictive factors.  
553 *Neurol Sci Off J Ital Neurol Soc Ital Soc Clin Neurophysiol* 2021; 42: 4903–4907.
- 554 [15] Luo D, Mei B, Wang P, Li X, Chen X, Wei G, et al. Prevalence and risk factors for  
555 persistent symptoms after COVID-19: a systematic review and meta-analysis. *Clin*  
556 *Microbiol Infect Off Publ Eur Soc Clin Microbiol Infect Dis* 2024; 30: 328–335.
- 557 [16] Tsampasian V, Elghazaly H, Chattopadhyay R, Debski M, Naing TKP, Garg P, et  
558 al. Risk Factors Associated With Post–COVID-19 Condition: A Systematic  
559 Review and Meta-analysis. *JAMA Intern Med* 2023; 183: 566–580.
- 560 [17] Ceban F, Ling S, Lui LMW, Lee Y, Gill H, Teopiz KM, et al. Fatigue and cognitive  
561 impairment in Post-COVID-19 Syndrome: A systematic review and meta-analysis.  
562 *Brain Behav Immun* 2022; 101: 93–135.
- 563 [18] Notarte KI, de Oliveira MHS, Peligro PJ, Velasco JV, Macaranas I, Ver AT, et al.  
564 Age, Sex and Previous Comorbidities as Risk Factors Not Associated with SARS-  
565 CoV-2 Infection for Long COVID-19: A Systematic Review and Meta-Analysis. *J*  
566 *Clin Med* 2022; 11: 7314.
- 567 [19] Bray G a., Kim K k., Wilding J p. h., Federation on behalf of the WO. Obesity: a  
568 chronic relapsing progressive disease process. A position statement of the World  
569 Obesity Federation. *Obes Rev* 2017; 18: 715–723.
- 570 [20] Mahara G, Tan X, Wang W. Risk Factors, Health Status, and Risk Groups in  
571 Suboptimal Health Condition. In: Wang W (ed) *All Around Suboptimal Health :  
572 Advanced Approaches by Predictive, Preventive and Personalised Medicine for  
573 Healthy Populations*. Cham: Springer Nature Switzerland, pp. 61–72.
- 574 [21] Hepatology TLG&. Obesity: another ongoing pandemic. *Lancet Gastroenterol*  
575 *Hepatol* 2021; 6: 411.
- 576 [22] Lockhart SM, O’Rahilly S. When Two Pandemics Meet: Why Is Obesity  
577 Associated with Increased COVID-19 Mortality? *Med N Y N* 2020; 1: 33–42.
- 578 [23] Swinburn BA, Kraak VI, Allender S, Atkins VJ, Baker PI, Bogard JR, et al. The  
579 Global Syndemic of Obesity, Undernutrition, and Climate Change: The Lancet  
580 Commission report. *Lancet Lond Engl* 2019; 393: 791–846.
- 581 [24] Nagar M, Geevarughese NM, Mishra R, Joshi A, Galwankar S, Yunus M, et al.  
582 Body-mass index COVID-19 severity: A systematic review of systematic reviews.  
583 *J Fam Med Prim Care* 2022; 11: 5351–5360.
- 584 [25] Armstrong RA, Kane AD, Cook TM. Outcomes from intensive care in patients  
585 with COVID-19: a systematic review and meta-analysis of observational studies.  
586 *Anaesthesia* 2020; 75: 1340–1349.
- 587 [26] Chen Z, Peng Y, Wu X, Pang B, Yang F, Zheng W, et al. Comorbidities and  
588 complications of COVID-19 associated with disease severity, progression, and  
589 mortality in China with centralized isolation and hospitalization: A systematic  
590 review and meta-analysis. *Front Public Health* 2022; 10: 923485.



- 591 [27] Staffolani S, Iencinella V, Cimatti M, Tavio M. Long COVID-19 syndrome as a  
592 fourth phase of SARS-CoV-2 infection. *Infez Med* 2022; 30: 22–29.
- 593 [28] Page MJ, McKenzie JE, Bossuyt PM, Boutron I, Hoffmann TC, Mulrow CD, et al.  
594 The PRISMA 2020 statement: an updated guideline for reporting systematic  
595 reviews. *The BMJ* 2021; 372: n71.
- 596 [29] McGowan J, Sampson M, Salzwedel DM, Cogo E, Foerster V, Lefebvre C. PRESS  
597 Peer Review of Electronic Search Strategies: 2015 Guideline Statement. *J Clin  
598 Epidemiol* 2016; 75: 40–46.
- 599 [30] Ouzzani M, Hammady H, Fedorowicz Z, Elmagarmid A. Rayyan—a web and  
600 mobile app for systematic reviews. *Syst Rev* 2016; 5: 210.
- 601 [31] WHO Consultation on Obesity (1999: Geneva S, Organization WH. *Obesity :  
602 preventing and managing the global epidemic : report of a WHO consultation.*  
603 World Health Organization, <https://iris.who.int/handle/10665/42330> (2000,  
604 accessed 12 June 2024).
- 605 [32] Li Z, He J, Wang Y, Bai M, Zhang Y, Chen H, et al. A cross-sectional study on the  
606 mental health of patients with COVID-19 1 year after discharge in Huanggang,  
607 China. *Eur Arch Psychiatry Clin Neurosci* 2023; 273: 301–310.
- 608 [33] Shang L, Wang L, Zhou F, Li J, Liu Y, Yang S. Long-term effects of obesity on  
609 COVID-19 patients discharged from hospital. *Immun Inflamm Dis* 2021; 9: 1678–  
610 1685.
- 611 [34] Higgins JPT, Morgan RL, Rooney AA, Taylor KW, Thayer KA, Silva RA, et al.  
612 A tool to assess risk of bias in non-randomized follow-up studies of exposure  
613 effects (ROBINS-E). *Environ Int* 2024; 186: 108602.
- 614 [35] Ryan R, Hill S. How to GRADE the quality of the evidence. Cochrane Consumers  
615 and Communication Group,. *Cochrane. Consumers and Communication*,  
616 <https://cccrg.cochrane.org/author-resources> (2016, accessed 8 November 2023).
- 617 [36] Schünemann HJ, Brożek J, Guyatt G, Oxman A. GRADE handbook,  
618 <https://gdt.gradepro.org/app/handbook/handbook.html#h.h2a1ln3pqdrc> (accessed  
619 18 June 2024).
- 620 [37] Guideline Development Tool,  
621 [https://gdt.gradepro.org/app/#projects/p\\_1\\_deboraronca\\_gmail\\_com\\_0\\_1bcf9a94-  
622 38f9-4870-ad7d-f19f0205fadc/evidence-syntheses/395b01fd-9923-48a0-81e7-  
623 cf4c69f477d2/quality-of-evidence](https://gdt.gradepro.org/app/#projects/p_1_deboraronca_gmail_com_0_1bcf9a94-38f9-4870-ad7d-f19f0205fadc/evidence-syntheses/395b01fd-9923-48a0-81e7-cf4c69f477d2/quality-of-evidence) (accessed 18 June 2024).
- 624 [38] DerSimonian R, Laird N. Meta-analysis in clinical trials. *Control Clin Trials* 1986;  
625 7: 177–188.
- 626 [39] Higgins J, Thomas J, Chandler J, Cumpston M, Li T, Page M, et al. Cochrane  
627 Handbook for Systematic Reviews of Interventions,  
628 <https://training.cochrane.org/handbook/current> (accessed 12 June 2024).

- 629 [40] Moy FM, Lim ERJ, Hairi NN, Bulgiba A. Depression and its associated factors  
630 among COVID-19 survivors in a middle income country. 2022;  
631 2022.12.15.22283550.
- 632 [41] Gaur R, Asthana S, Yadav R, Ghuleliya R, Kumar D, Akhtar M, et al. Assessment  
633 of Physical Disability After Three Months in Patients Recovered From COVID-  
634 19: A Cross-Sectional Study. *Cureus*; 14: e21618.
- 635 [42] Farhanah N, Charles Budiman, Muchlis Achsan Udji Sofro, Budi Riyanto, Suharyo  
636 Hadisaputro, Muhammad Hussein Gasem. The Persistent Symptoms and  
637 Decreased Quality of Life of COVID-19 Patients (A 3-month Follow-up after  
638 Discharge) | Open Access Macedonian Journal of Medical Sciences,  
639 <https://oamjms.eu/index.php/mjms/article/view/9755> (2024, accessed 9 June  
640 2024).
- 641 [43] Miyazato Y, Tsuzuki S, Morioka S, Terada M, Kutsuna S, Saito S, et al. Factors  
642 associated with development and persistence of post-COVID conditions: A cross-  
643 sectional study. *J Infect Chemother* 2022; 28: 1242–1248.
- 644 [44] Alkwai HM, Khalifa AM, Ahmed AM, Alnajib AM, Alshammari KA, Alrashidi  
645 MM, et al. Persistence of COVID-19 symptoms beyond 3 months and the delayed  
646 return to the usual state of health in Saudi Arabia: A cross-sectional study. *SAGE*  
647 *Open Med* 2022; 10: 20503121221129918.
- 648 [45] Sørensen AIV, Spiliopoulos L, Bager P, Nielsen NM, Hansen JV, Koch A, et al. A  
649 nationwide questionnaire study of post-acute symptoms and health problems after  
650 SARS-CoV-2 infection in Denmark. *Nat Commun* 2022; 13: 4213.
- 651 [46] van Wijhe M, Fogh K, Ethelberg S, Karmark Iversen K, Nielsen H, Østergaard L,  
652 et al. Persistent Symptoms and Sequelae After Severe Acute Respiratory Syndrome  
653 Coronavirus 2 Infection Not Requiring Hospitalization: Results From Testing  
654 Denmark, a Danish Cross-sectional Survey. *Open Forum Infect Dis* 2022; 10:  
655 ofac679.
- 656 [47] Whitaker M, Elliott J, Chadeau-Hyam M, Riley S, Darzi A, Cooke G, et al.  
657 Persistent COVID-19 symptoms in a community study of 606,434 people in  
658 England. *Nat Commun* 2022; 13: 1957.
- 659 [48] Bungenberg J, Humkamp K, Hohenfeld C, Rust MI, Ermis U, Dreher M, et al.  
660 Long COVID-19: Objectifying most self-reported neurological symptoms. *Ann*  
661 *Clin Transl Neurol* 2022; 9: 141–154.
- 662 [49] Vassalini P, Serra R, Tarsitani L, Koukopoulos AE, Borrazzo C, Alessi F, et al.  
663 Depressive Symptoms among Individuals Hospitalized with COVID-19: Three-  
664 Month Follow-Up. *Brain Sci* 2021; 11: 1175.
- 665 [50] Chudzik M, Lewek J, Kapusta J, Banach M, Jankowski P, Bielecka-Dabrowa A.  
666 Predictors of Long COVID in Patients without Comorbidities: Data from the Polish  
667 Long-COVID Cardiovascular (PoLoCOV-CVD) Study. *J Clin Med* 2022; 11:  
668 4980.

- 669 [51] Fernández-de-las-Peñas C, Torres-Macho J, Elvira-Martínez CM,  
670 Molina-Trigueros LJ, Sebastián-Viana T, Hernández-Barrera V. Obesity is  
671 associated with a greater number of long-term post-COVID symptoms and poor  
672 sleep quality: A multicentre case-control study. *Int J Clin Pract* 2021; 75: e14917.
- 673 [52] Desgranges F, Tadini E, Munting A, Regina J, Filippidis P, Viala B, et al.  
674 Post-COVID-19 Syndrome in Outpatients: a Cohort Study. *J Gen Intern Med* 2022;  
675 37: 1943–1952.
- 676 [53] Blümel JE, Vallejo MS, Bencosme A, Calle A, Dextre M, Díaz K, et al. Post-  
677 COVID-19 syndrome in a sample of climacteric women living in Latin America.  
678 *Menopause N Y N* 2023; 30: 165–173.
- 679 [54] Carter SJ, Baranauskas MN, Raglin JS, Pescosolido BA, Perry BL. Functional  
680 Status, Mood State, and Physical Activity Among Women With Post-Acute  
681 COVID-19 Syndrome. *Int J Public Health* 2022; 67: 1604589.
- 682 [55] Epsi NJ, Chenoweth JG, Blair PW, Lindholm DA, Ganesan A, Lalani T, et al.  
683 Precision Symptom Phenotyping Identifies Early Clinical and Proteomic  
684 Predictors of Distinct COVID-19 Sequelae. *J Infect Dis* 2024; jiae318.
- 685 [56] Global Burden of Disease Long COVID Collaborators, Wulf Hanson S, Abbafati  
686 C, Aerts JG, Al-Aly Z, Ashbaugh C, et al. Estimated Global Proportions of  
687 Individuals With Persistent Fatigue, Cognitive, and Respiratory Symptom Clusters  
688 Following Symptomatic COVID-19 in 2020 and 2021. *JAMA* 2022; 328: 1604–  
689 1615.
- 690 [57] Lledó GM, Sellares J, Brotons C, Sans M, Antón JD, Blanco J, et al. Post-acute  
691 COVID-19 syndrome: a new tsunami requiring a universal case definition. *Clin  
692 Microbiol Infect* 2022; 28: 315–318.
- 693 [58] Quan M, Wang X, Gong M, Wang Q, Li Y, Jia J. Post-COVID cognitive  
694 dysfunction: current status and research recommendations for high risk population.  
695 *Lancet Reg Health – West Pac*; 38. Epub ahead of print 1 September 2023. DOI:  
696 10.1016/j.lanwpc.2023.100836.
- 697 [59] Mansell V, Dykgraaf SH, Kidd M, Goodyear-Smith F. Long COVID and older  
698 people. *Lancet Healthy Longev* 2022; 3: e849–e854.
- 699 [60] Wilk P, Stranges S, Cuschieri S. Does sex modify the effect of pre-pandemic body  
700 mass index on the risk of Long COVID? Evidence from the longitudinal analysis  
701 of the Survey of Health, Ageing and Retirement in Europe. *Int J Obes* 2024;  
702 48: 821–829.
- 703 [61] Tana C, Giamberardino MA, Martelletti P. Long COVID and especially headache  
704 syndromes. *Curr Opin Neurol* 2023; 36: 168.
- 705 [62] Melamed OC, Selby P, Taylor VH. Mental Health and Obesity During the COVID-  
706 19 Pandemic. *Curr Obes Rep* 2022; 11: 23–31.

- 707 [63] Avila C, Holloway AC, Hahn MK, Morrison KM, Restivo M, Anglin R, et al. An  
708 Overview of Links Between Obesity and Mental Health. *Curr Obes Rep* 2015; 4:  
709 303–310.
- 710 [64] Contreras-Rodriguez O, Solanas M, Escorihuela RM. Dissecting ultra-processed  
711 foods and drinks: Do they have a potential to impact the brain? *Rev Endocr Metab*  
712 *Disord* 2022; 23: 697–717.
- 713 [65] Gunes-Bayir A, Tandogan Z, Gedik-Toker Ö, Yabaci-Tak A, Dadak A. A  
714 Comparison Study of Nutritional Assessment, Diet and Physical Activity Habits,  
715 Lifestyle and Socio-Demographic Characteristics in Individuals with and without  
716 Dizziness/Vertigo. *Nutrients* 2023; 15: 4055.
- 717 [66] Neuhauser HK. The epidemiology of dizziness and vertigo. *Handb Clin Neurol*  
718 2016; 137: 67–82.
- 719 [67] Hassan NM, Salim HS, Amaran S, Yunus NI, Yusof NA, Daud N, et al. Prevalence  
720 of mental health problems among children with long COVID: A systematic review  
721 and meta-analysis. *PLOS ONE* 2023; 18: e0282538.
- 722 [68] Bourmistrova NW, Solomon T, Braude P, Strawbridge R, Carter B. Long-term  
723 effects of COVID-19 on mental health: A systematic review. *J Affect Disord* 2022;  
724 299: 118–125.
- 725 [69] Staples LG, Nielssen O, Dear BF, Bisby MA, Fisher A, Kayrouz R, et al.  
726 Prevalence and Predictors of Long COVID in Patients Accessing a National Digital  
727 Mental Health Service. *Int J Environ Res Public Health* 2023; 20: 6756.
- 728 [70] van der Feltz-Cornelis C, Turk F, Sweetman J, Khunti K, Gabbay M, Shepherd J,  
729 et al. Prevalence of mental health conditions and brain fog in people with long  
730 COVID: A systematic review and meta-analysis. *Gen Hosp Psychiatry* 2024; 88:  
731 10–22.
- 732 [71] Amiri S, Behnezhad S, Nadinlui KB. Body Mass Index (BMI) and risk of  
733 depression in adults: A systematic review and meta-analysis of longitudinal  
734 studies. *Obes Med* 2018; 12: 1–12.
- 735 [72] Aminian A, Bena J, Pantalone KM, Burguera B. Association of obesity with  
736 postacute sequelae of COVID-19. *Diabetes Obes Metab* 2021; 23: 2183–2188.
- 737 [73] N S, Ib M, Jjv M. Obesity Is a Risk Factor for Severe COVID-19 Infection:  
738 Multiple Potential Mechanisms. *Circulation*; 142. Epub ahead of print 7 July 2020.  
739 DOI: 10.1161/CIRCULATIONAHA.120.047659.
- 740 [74] McNeill JN, Lau ES, Paniagua SM, Liu EE, Wang JK, Bassett IV, et al. The role  
741 of obesity in inflammatory markers in COVID-19 patients. *Obes Res Clin Pract*  
742 2021; 15: 96–99.
- 743 [75] N A, My K, Pb M, Se P. Causal Inference for Genetic Obesity, Cardiometabolic  
744 Profile and COVID-19 Susceptibility: A Mendelian Randomization Study. *Front*  
745 *Genet*; 11. Epub ahead of print 11 November 2020. DOI:  
746 10.3389/fgene.2020.586308.

- 747 [76] Fernández-de-las-Peñas C, Rodríguez-Jiménez J, Cancela-Cilleruelo I, Guerrero-  
748 Peral A, Martín-Guerrero JD, García-Azorín D, et al. Post–COVID-19 Symptoms  
749 2 Years After SARS-CoV-2 Infection Among Hospitalized vs Nonhospitalized  
750 Patients. *JAMA Netw Open* 2022; 5: e2242106.
- 751 [77] Hlatshwako TG, Shah SJ, Kosana P, Adebayo E, Hendriks J, Larsson EC, et al.  
752 Online health survey research during COVID-19. *Lancet Digit Health* 2021; 3:  
753 e76–e77.
- 754 [78] Thaweethai T, Jolley SE, Karlson EW, Levitan EB, Levy B, McComsey GA, et al.  
755 Development of a Definition of Postacute Sequelae of SARS-CoV-2 Infection.  
756 *JAMA* 2023; 329: 1934–1946.
- 757 [79] Burns G. Newcastle Post-COVID Syndrome Follow Up Screening Questionnaire,  
758 [https://postcovidsyndromebsol.nhs.uk/images/Content/  
759 Newcastle\\_post\\_Covid\\_Screening\\_Tool.pdf](https://postcovidsyndromebsol.nhs.uk/images/Content/Newcastle_post_Covid_Screening_Tool.pdf). (accessed 12 July 2024).
- 760 [80] Zhang X, Ha S, Lau HC-H, Yu J. Excess body weight: Novel insights into its roles  
761 in obesity comorbidities. *Semin Cancer Biol* 2023; 92: 16–27.
- 762

## 764 **Supporting Information**

765

766 **S1 Table. Database search strategy.**

767 **S2 Table. Frequency of Post-COVID Condition neuropsychiatric symptoms of**  
768 **included studies that did not test for statistical differences according to nutritional**

769 **status.** Excess weight group (BMI  $\geq$  25kg/m<sup>2</sup>); NW: Normal Weight group (BMI < 25kg/m<sup>2</sup>); Obesity  
770 group (BMI  $\geq$  30kg/m<sup>2</sup>); NOb: Non-obesity group (BMI < 30kg/m<sup>2</sup>).

771 **S1 Fig 1a: Forest-plots of excess weight and neuropsychiatric symptoms (non-**  
772 **significantly associations).**

773 **S1 Fig 1b. Forest-plots of obesity and neurological and neuropsychiatric symptoms**  
774 **(non-significantly associations)**

775 **S2 Fig 2. Forest-plot of the association of excess weight and the risk of neurological**  
776 **and neuropsychiatric symptoms.**

777 **S3 Fig 3. Traffic light plots of risk of bias of included studies that reported the risk**  
778 **of developing neuro-symptoms assessed by Robbins-e tool.**

779 **S3 Table 3. Assessment of the overall certainty of the evidence for studies thar**  
780 **compared the frequency of PCC neurological and neuropsychiatric symptoms**  
781 **among individuals with obesity and control groups**

### (a) Depression

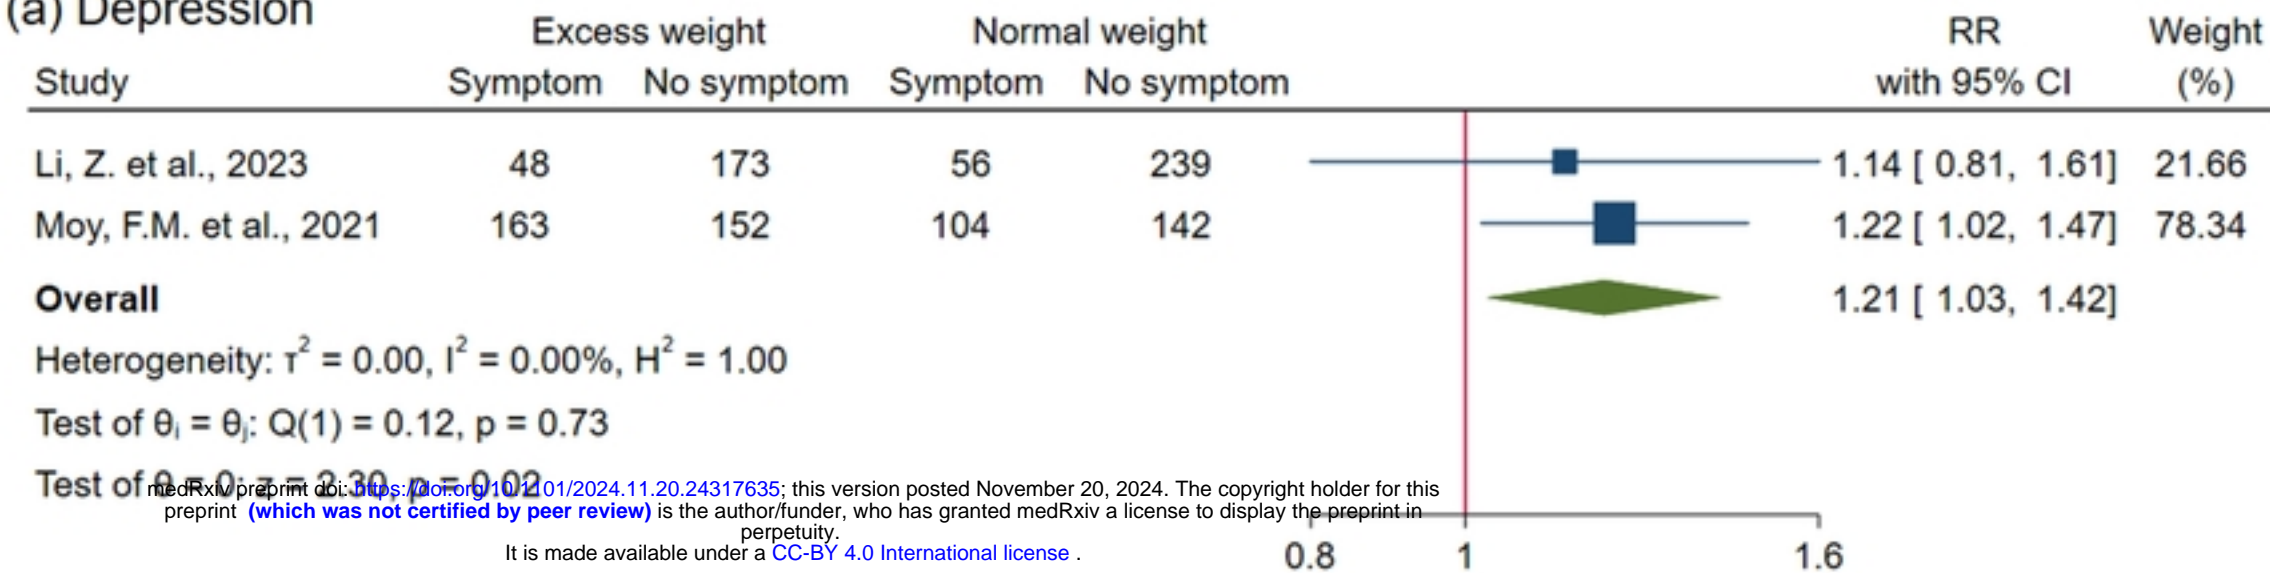

Random-effects DerSimonian-Laird model

### (b) Sleep disturbance

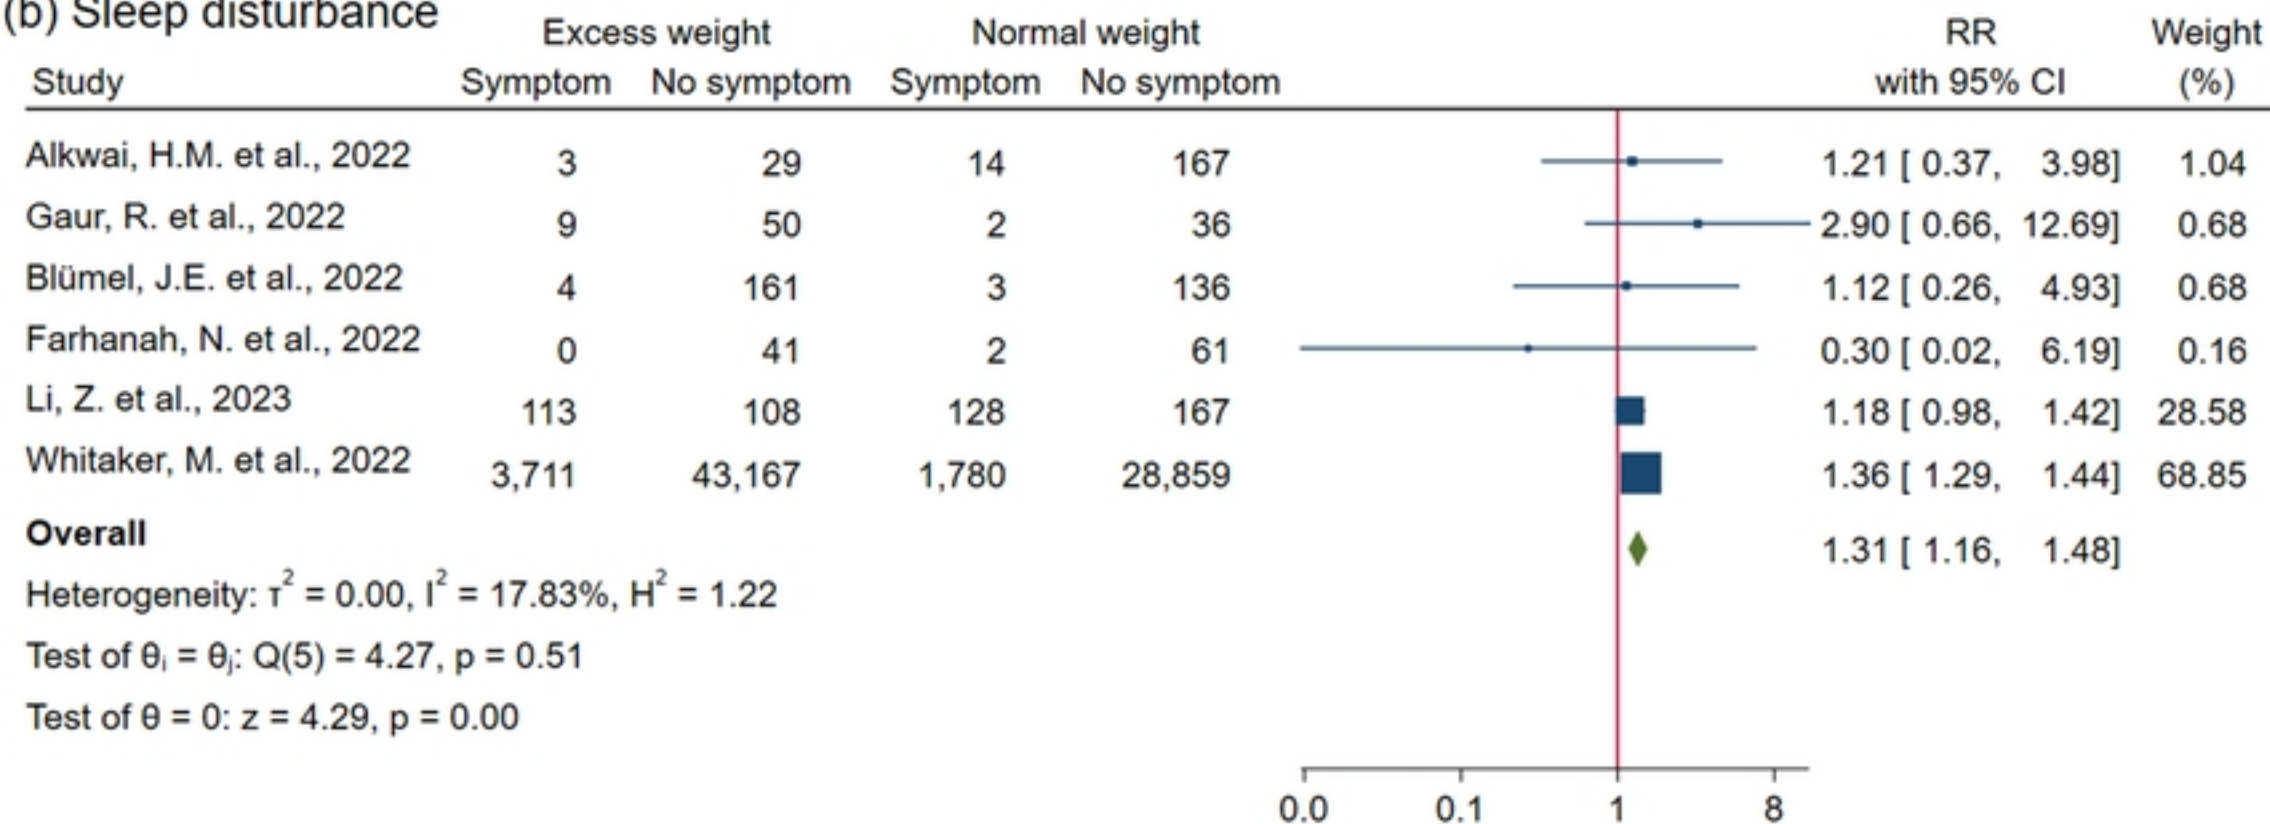

Random-effects REML model

### (c) Headache

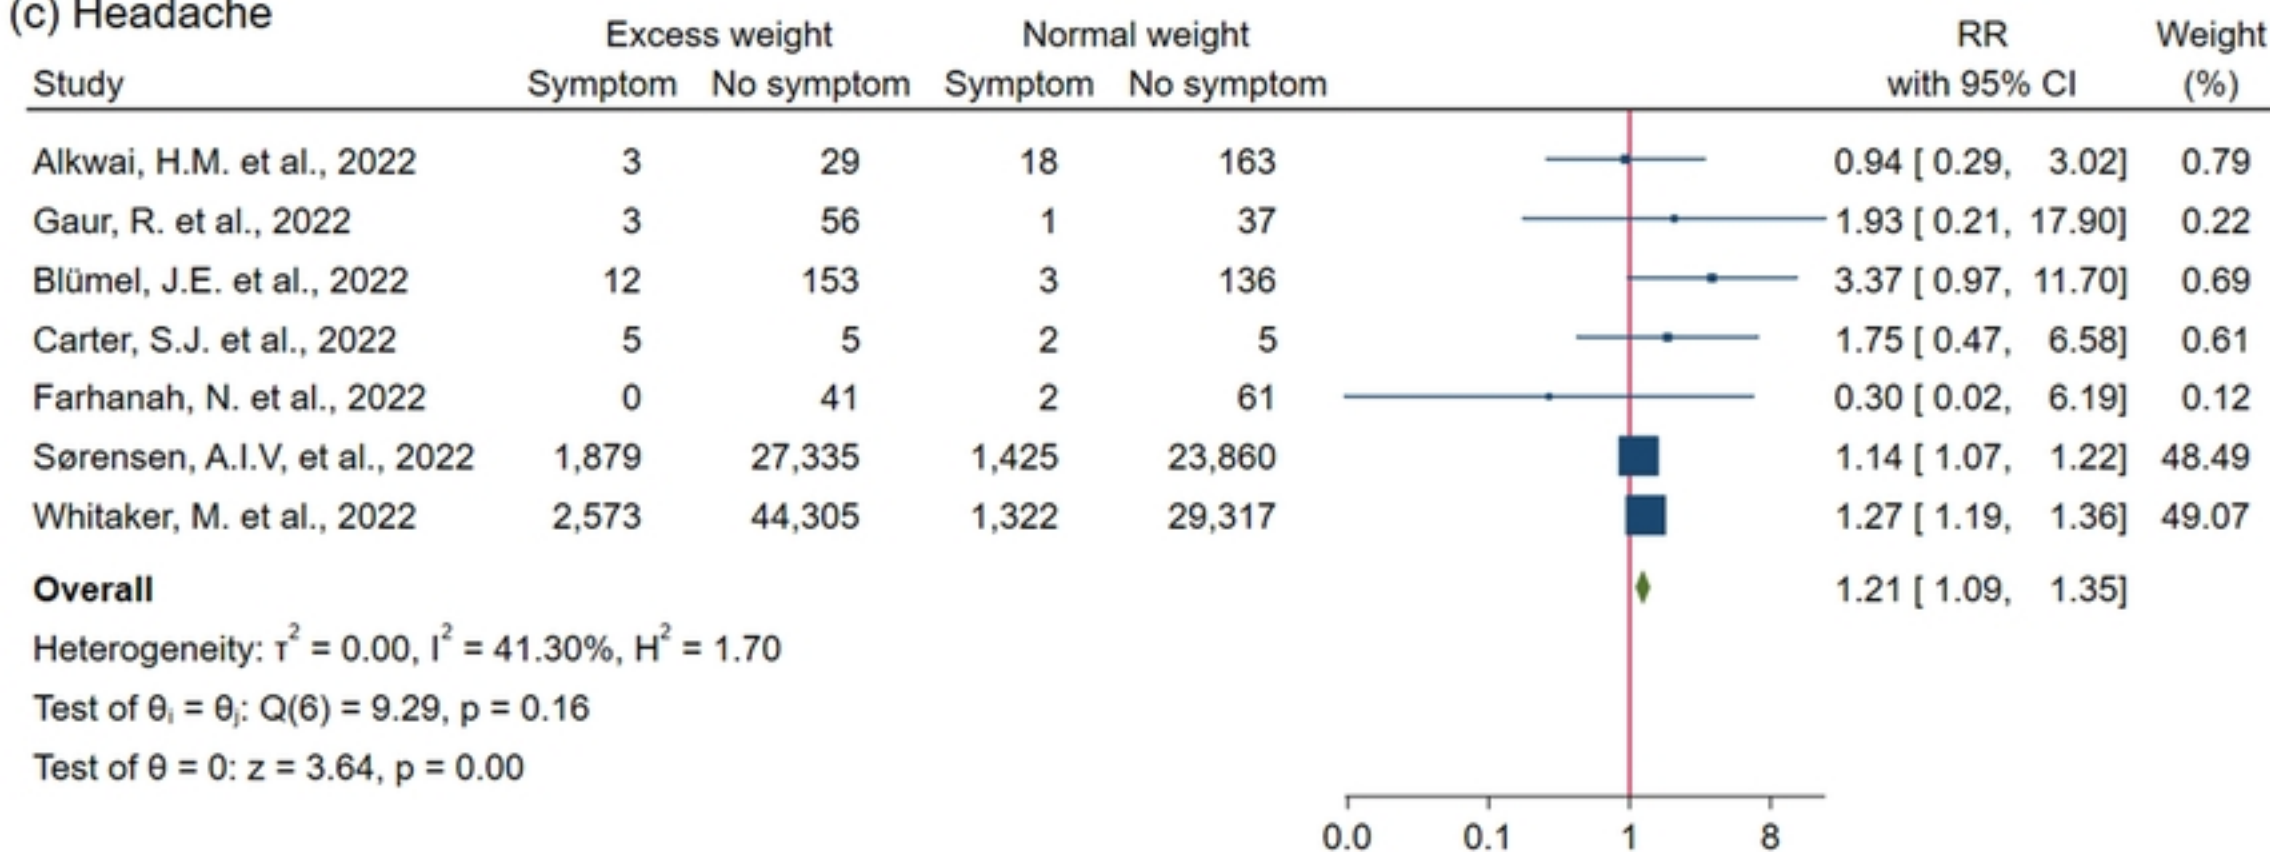

Figure 3a

(d) Memory issues

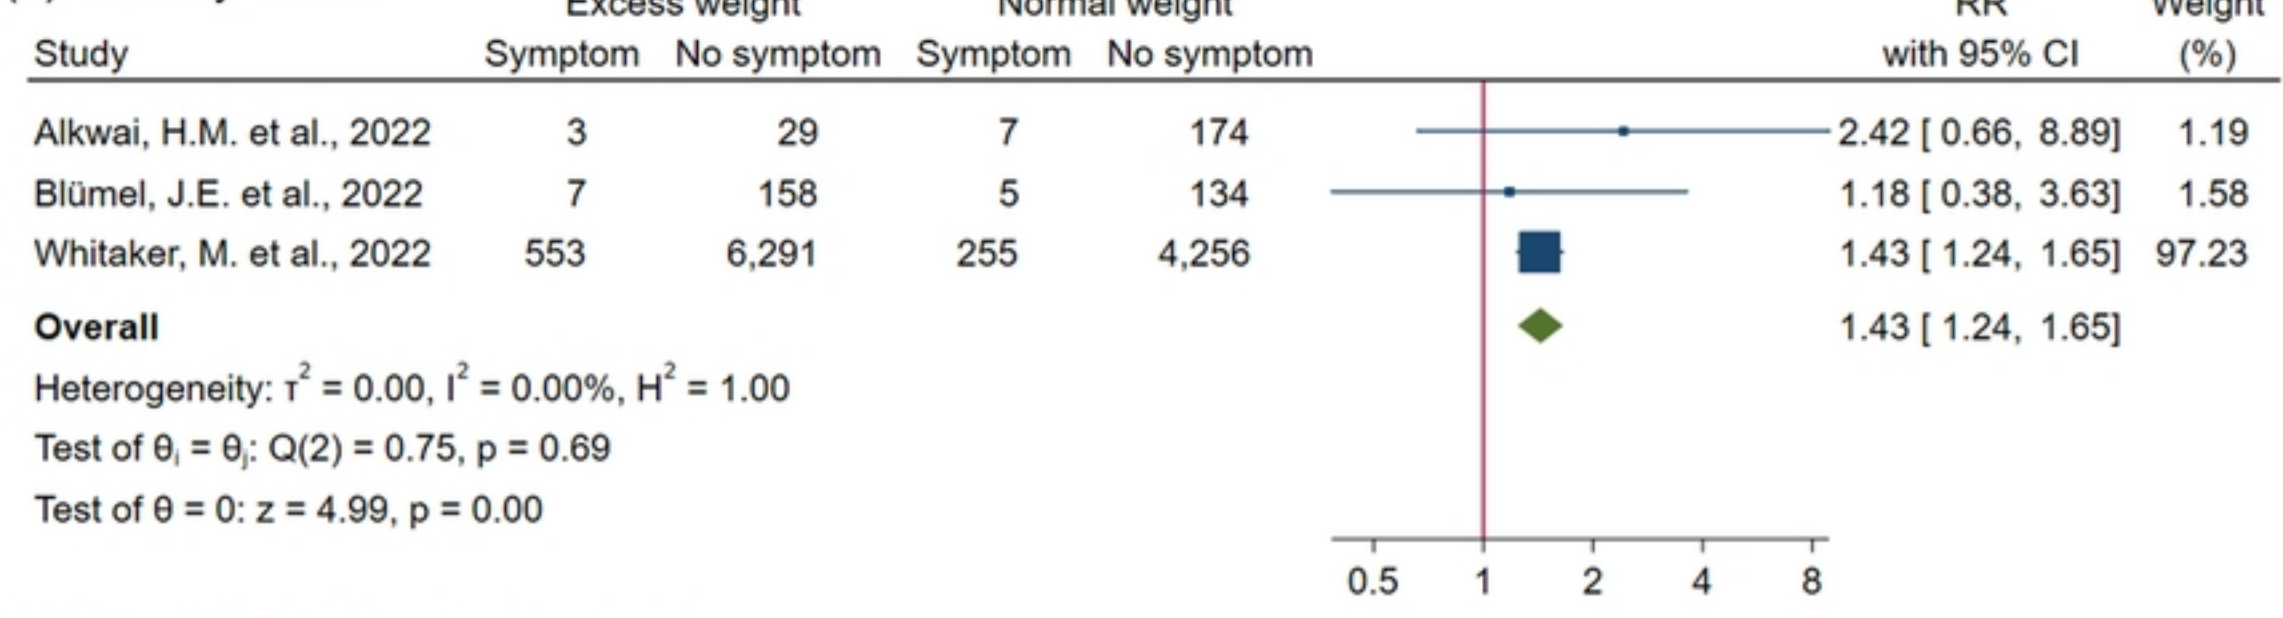

Random-effects DerSimonian-Laird model

(e) Numbness

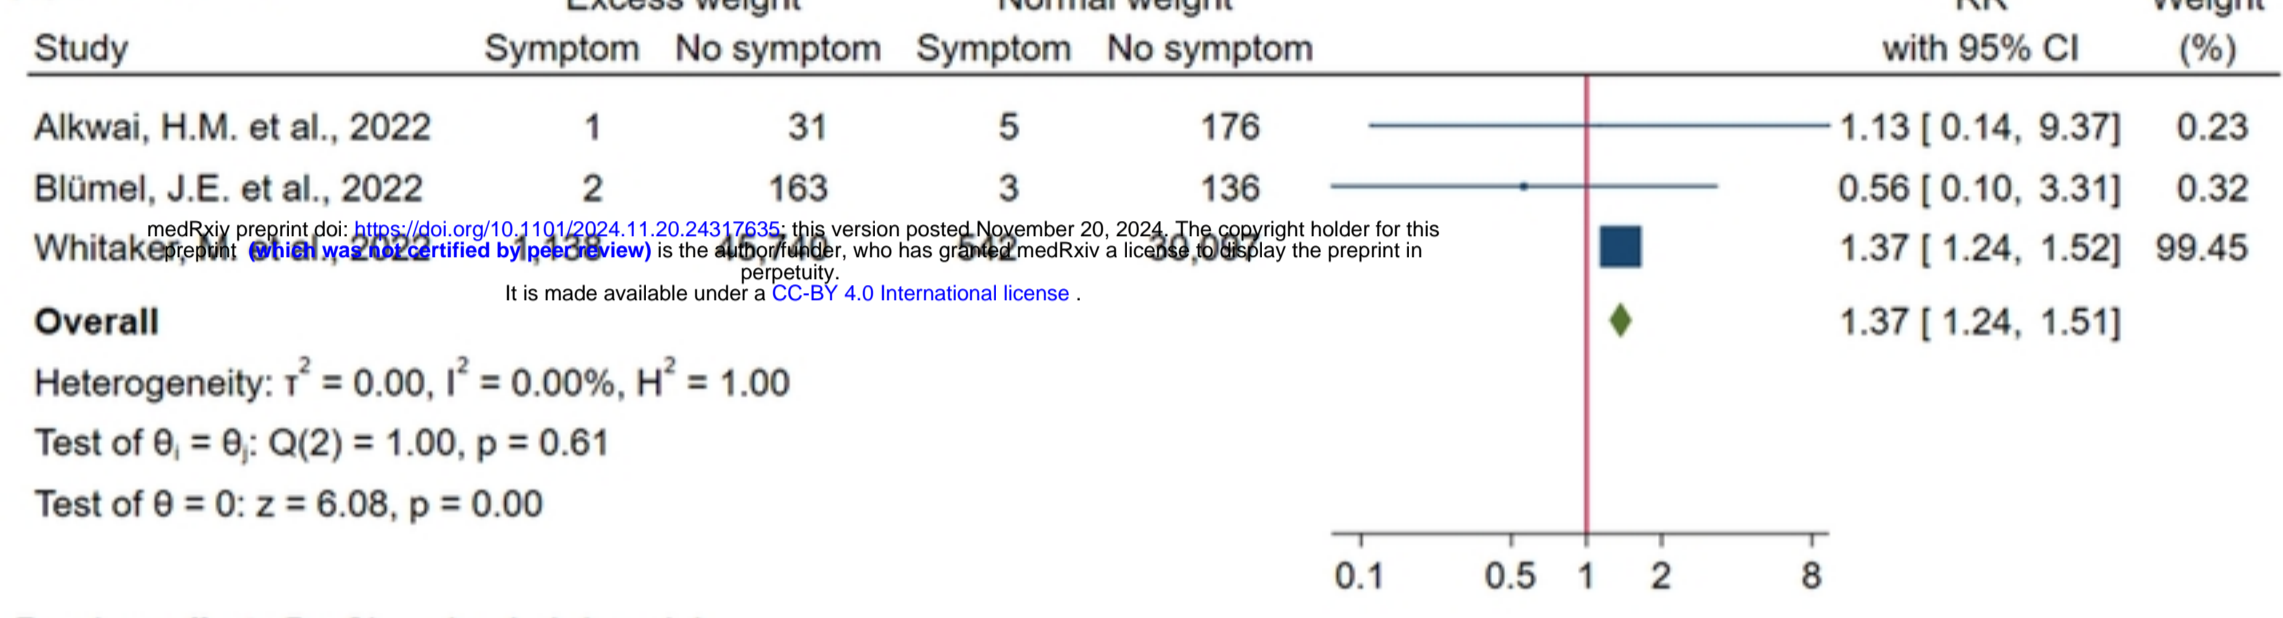

Random-effects DerSimonian-Laird model

(f) Taste disorder

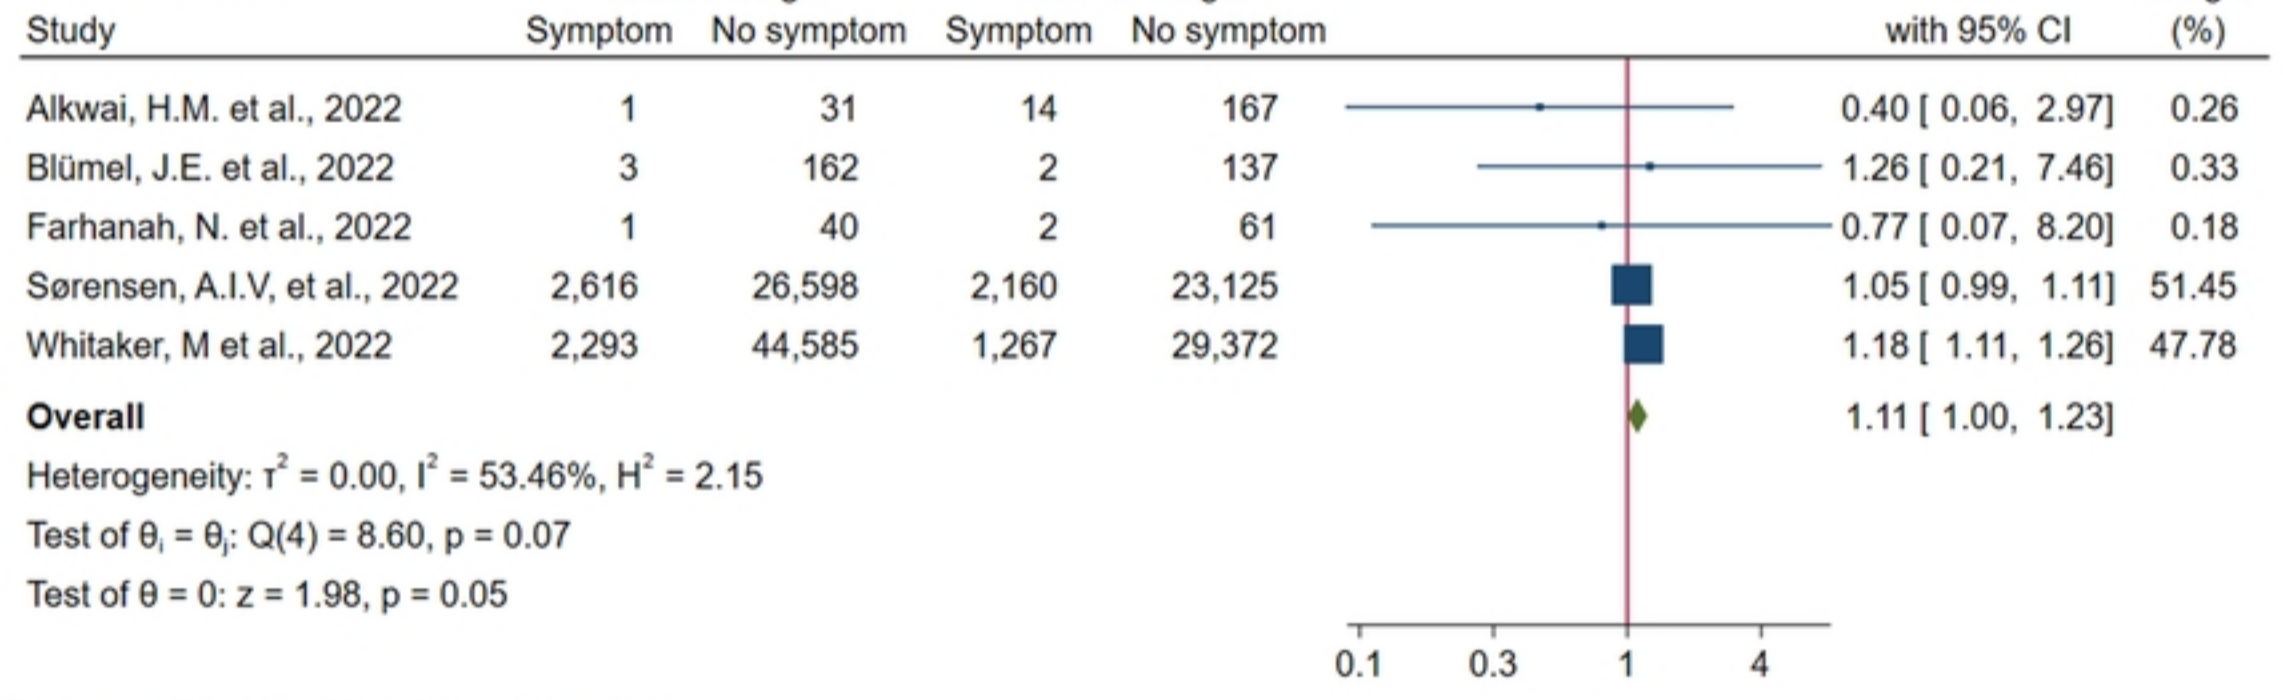

Random-effects DerSimonian-Laird model

(g) Vertigo

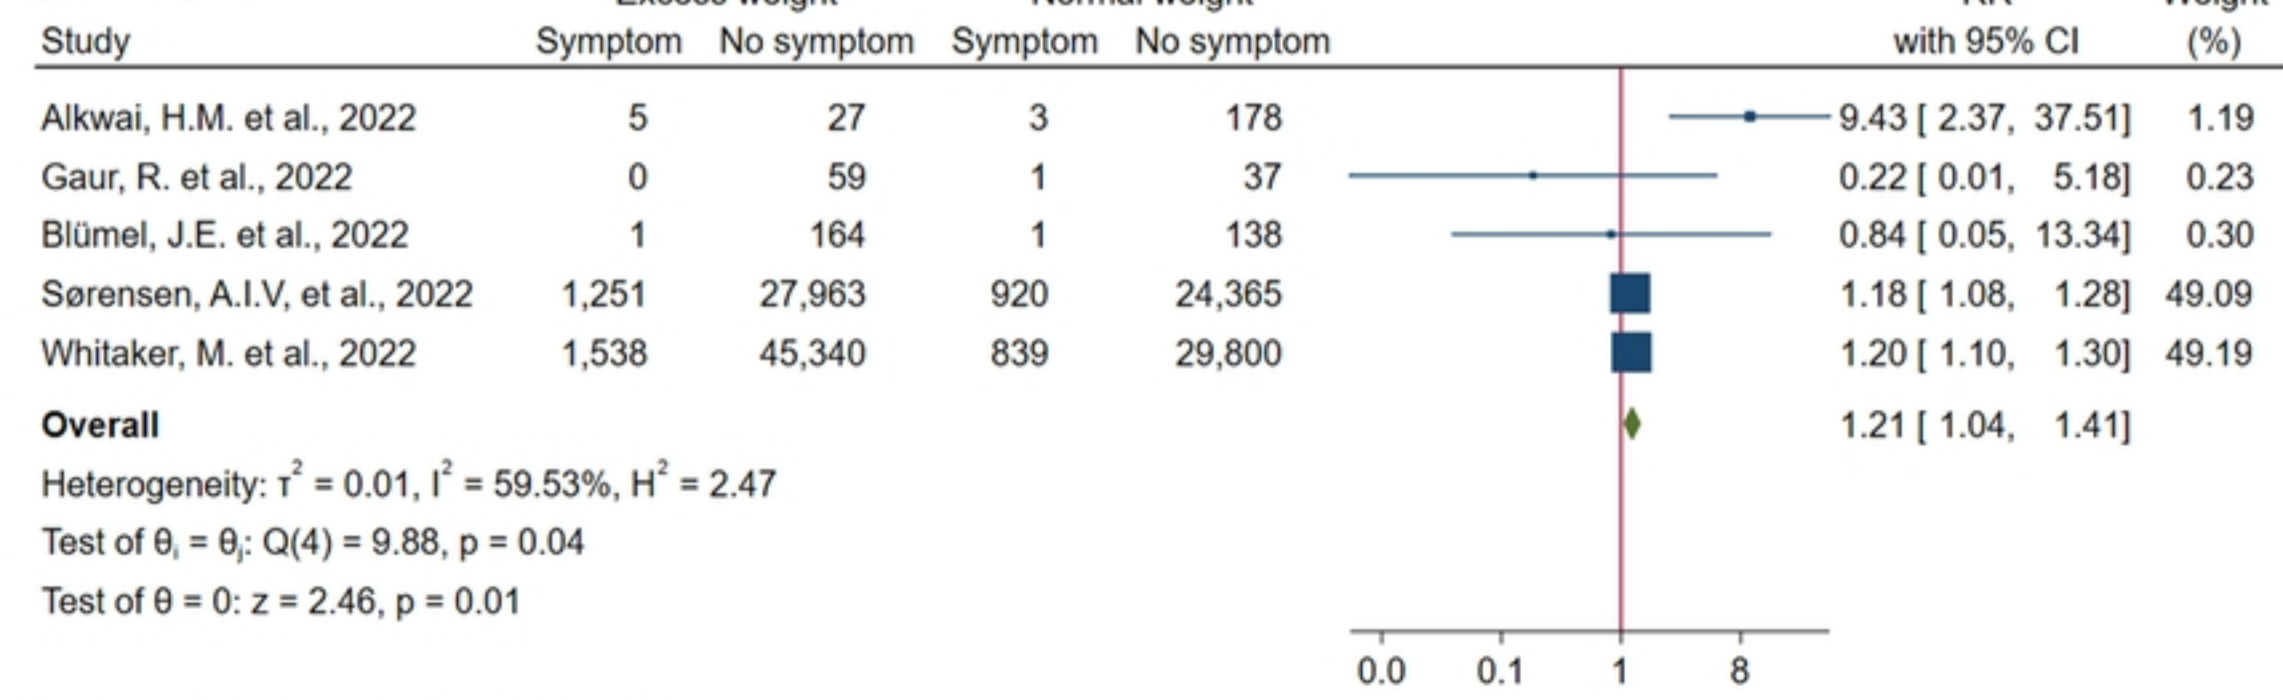

Random-effects DerSimonian-Laird model

Figure 3b



**(a) Headache**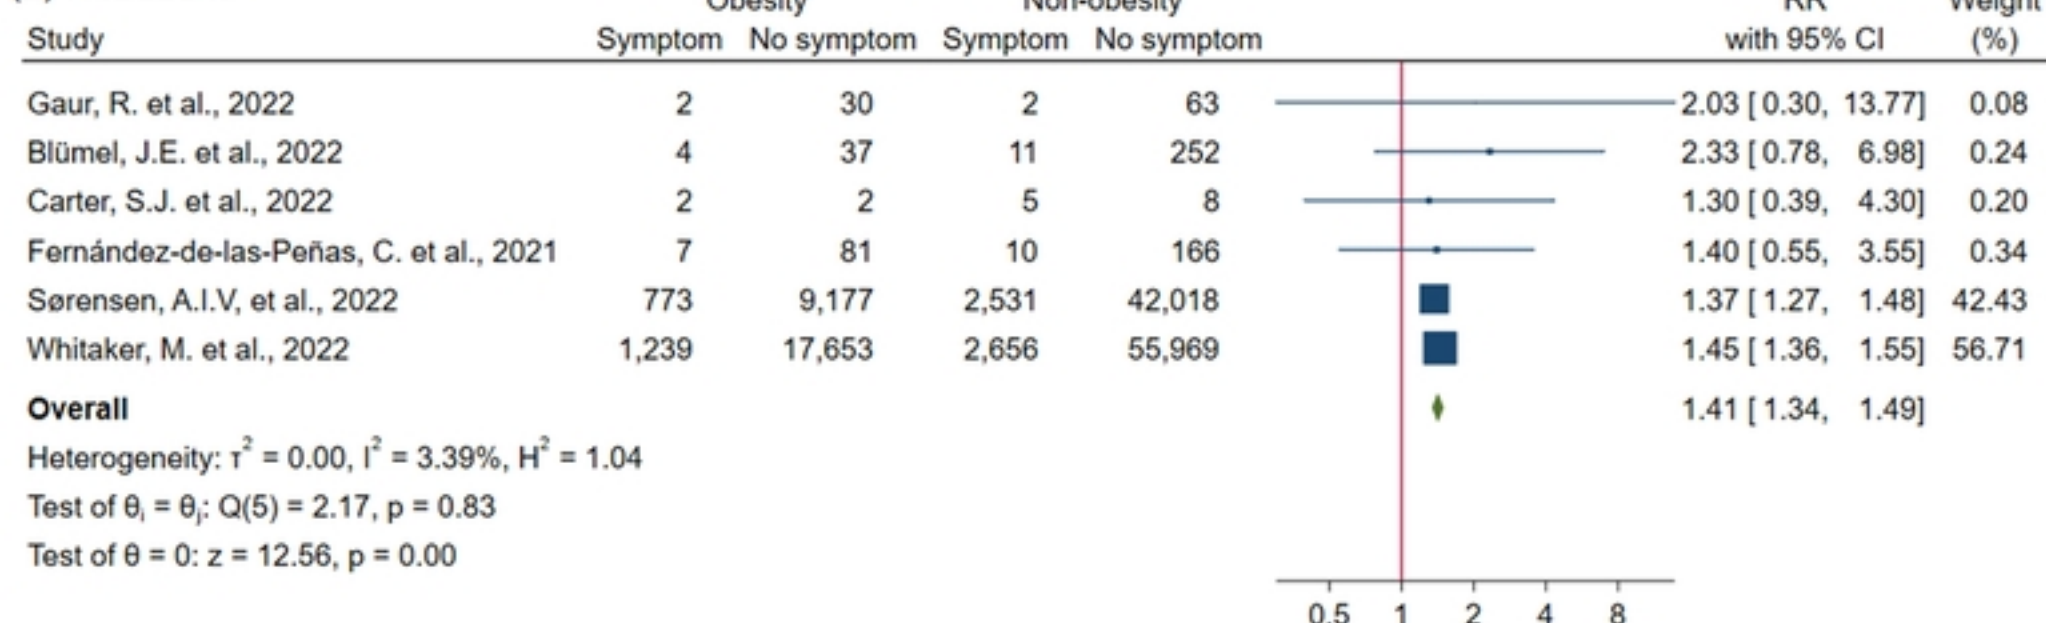

Random-effects REML model

**(b) Memory issues**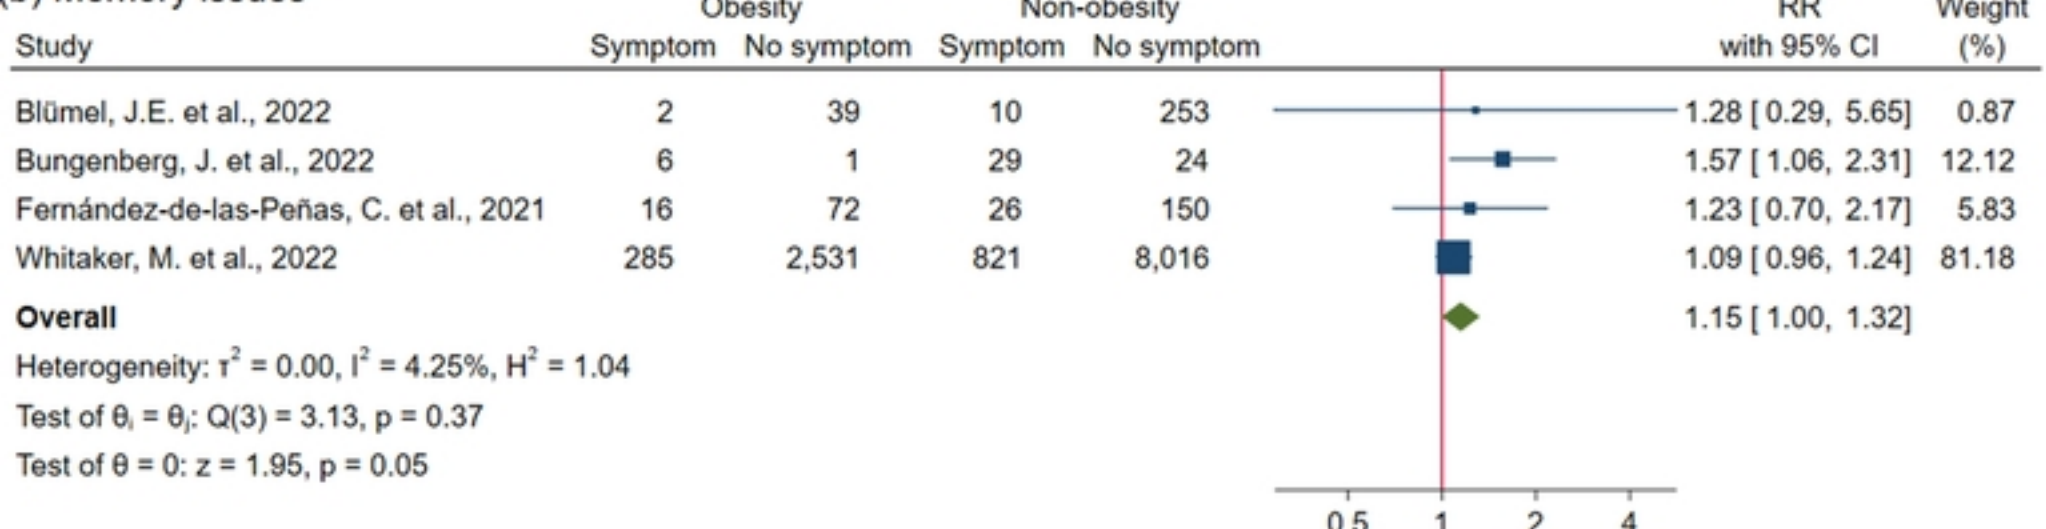

Random-effects DerSimonian-Laird model

**(c) Numbness**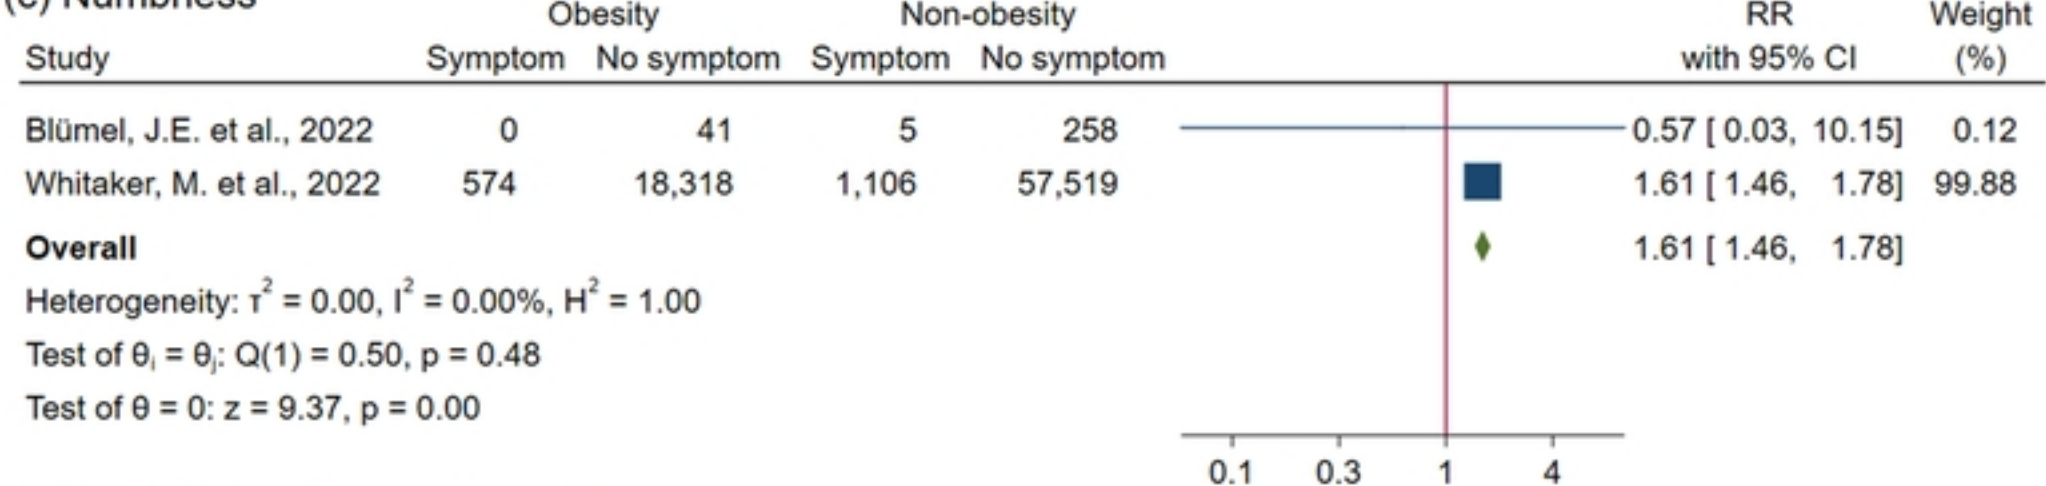

Random-effects DerSimonian-Laird model

Figure 4a

(d) Smell disorder

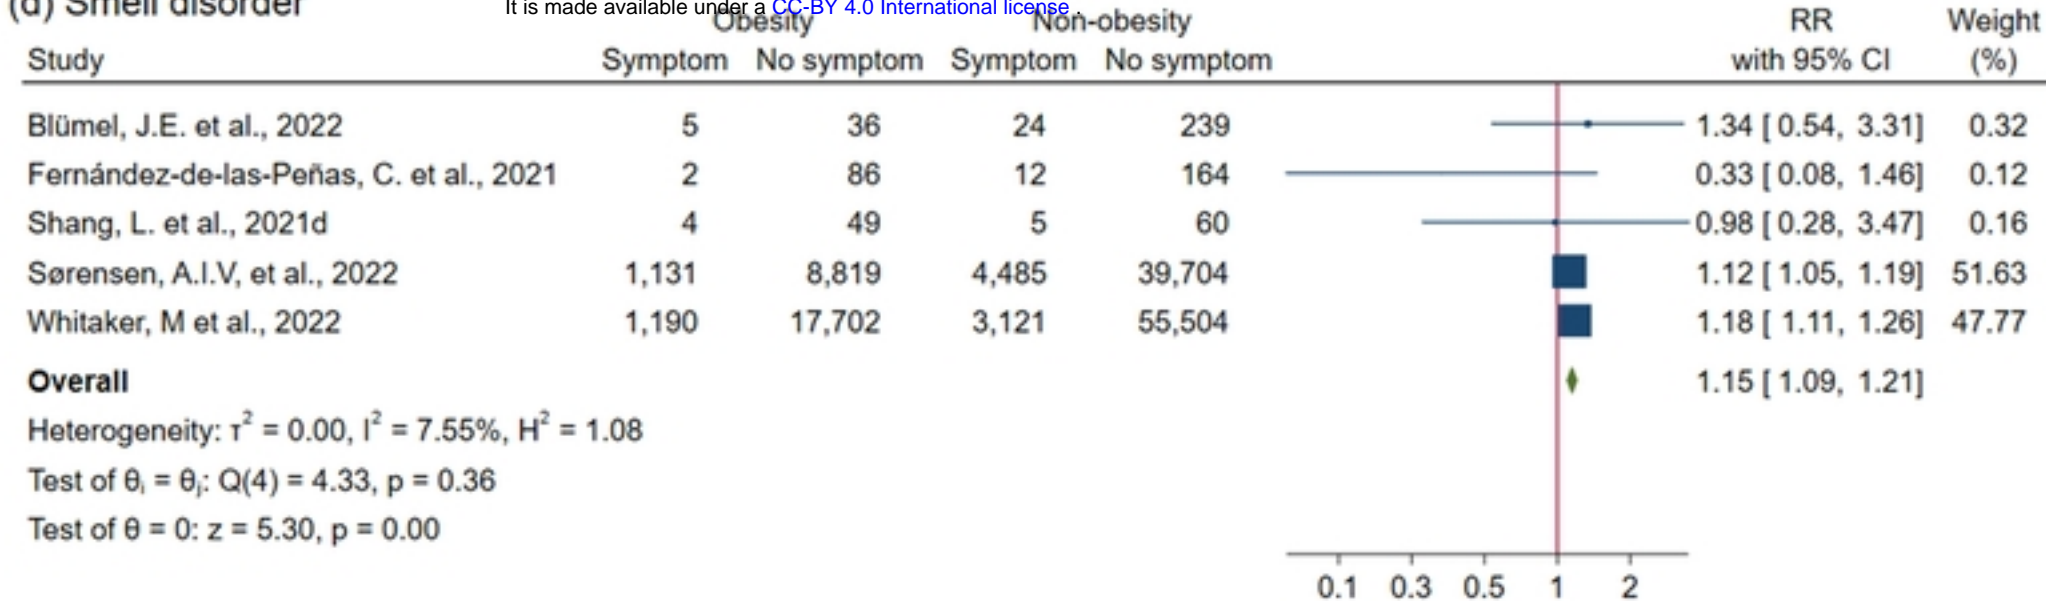

Random-effects DerSimonian-Laird model

(e) Taste disorder

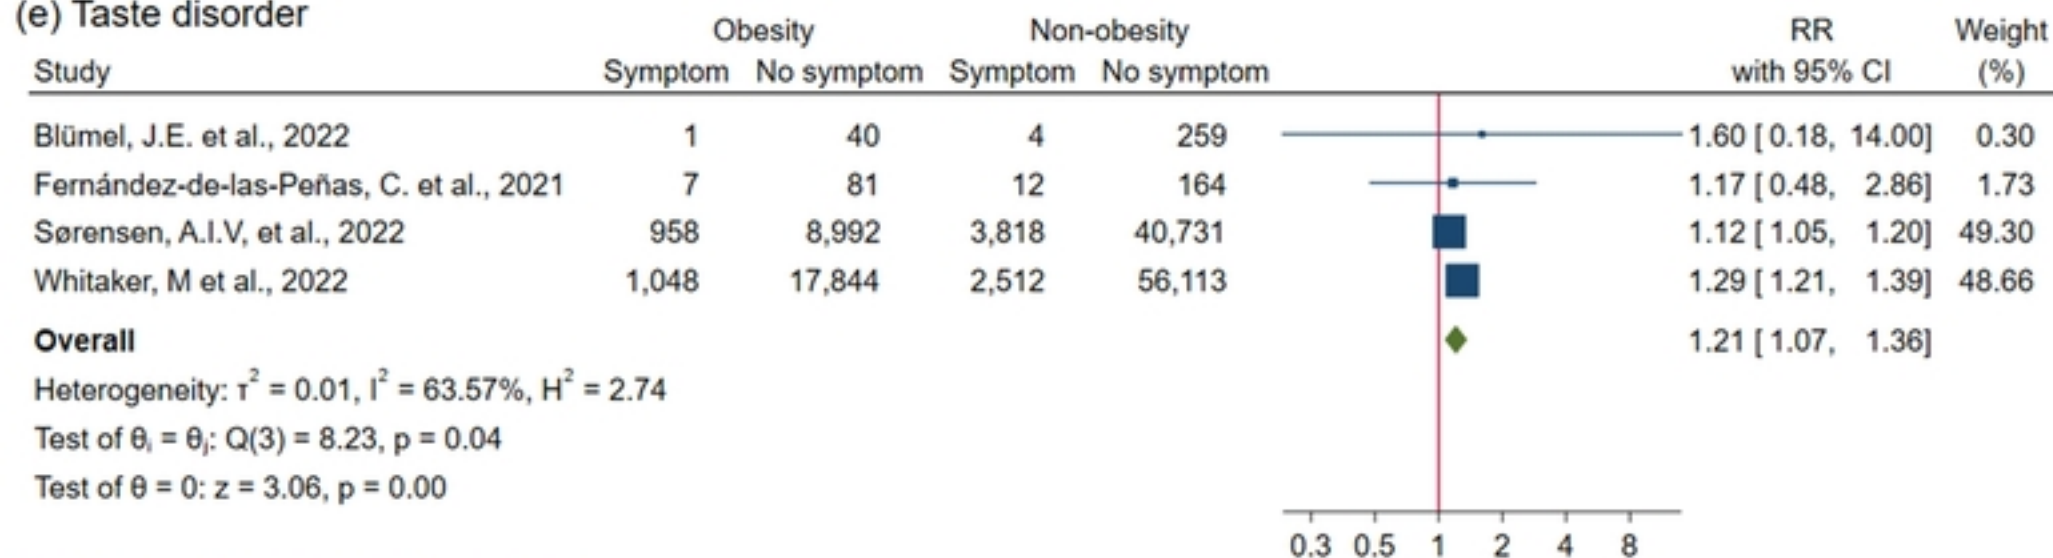

Random-effects DerSimonian-Laird model

(f) Vertigo

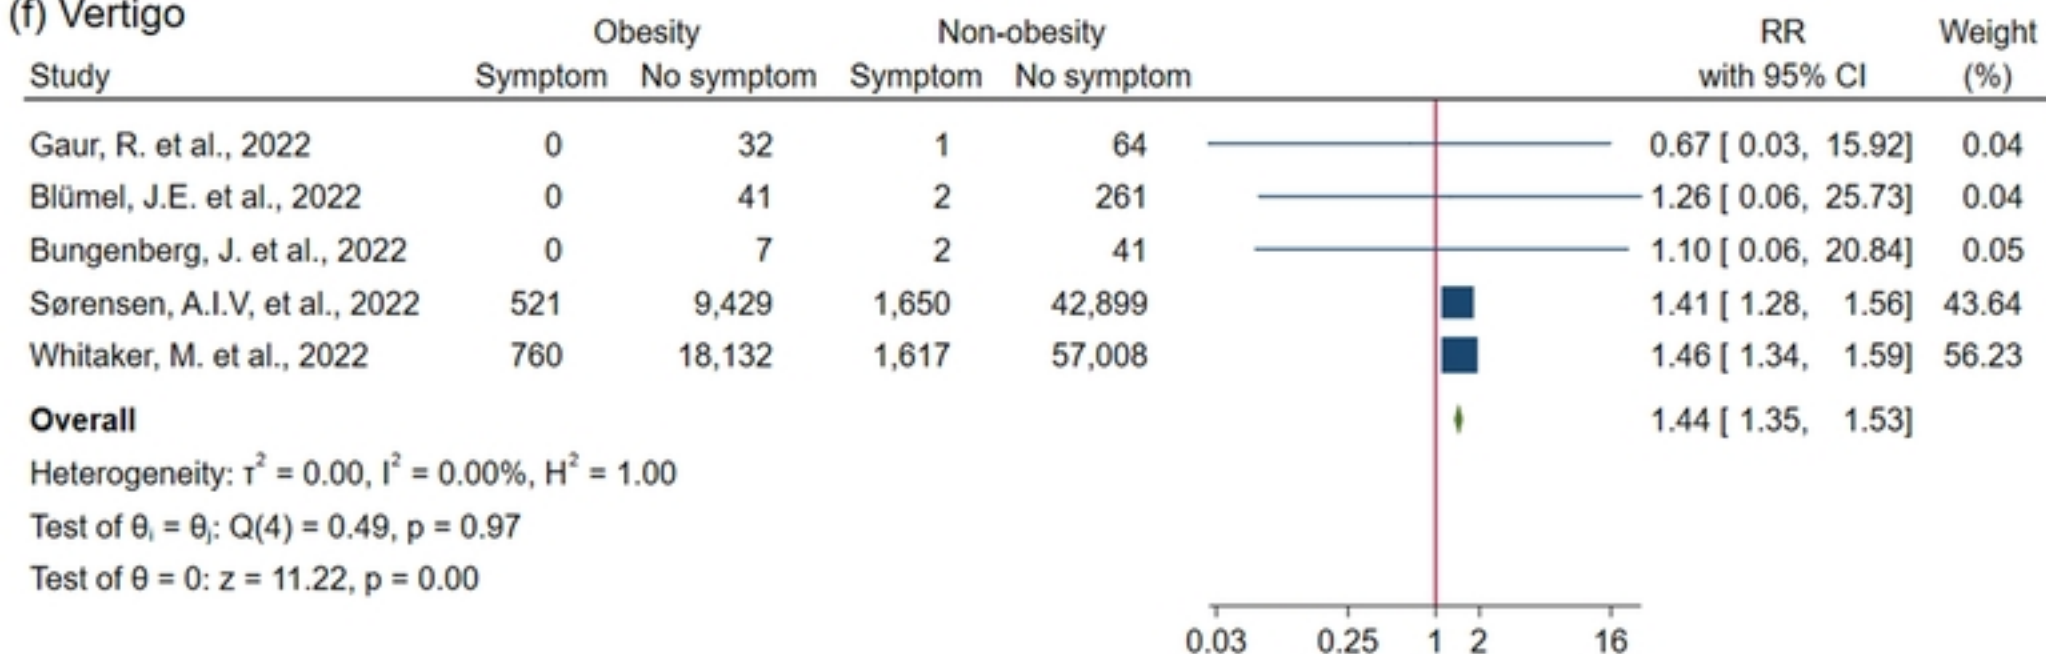

Random-effects DerSimonian-Laird model

Figure 4b

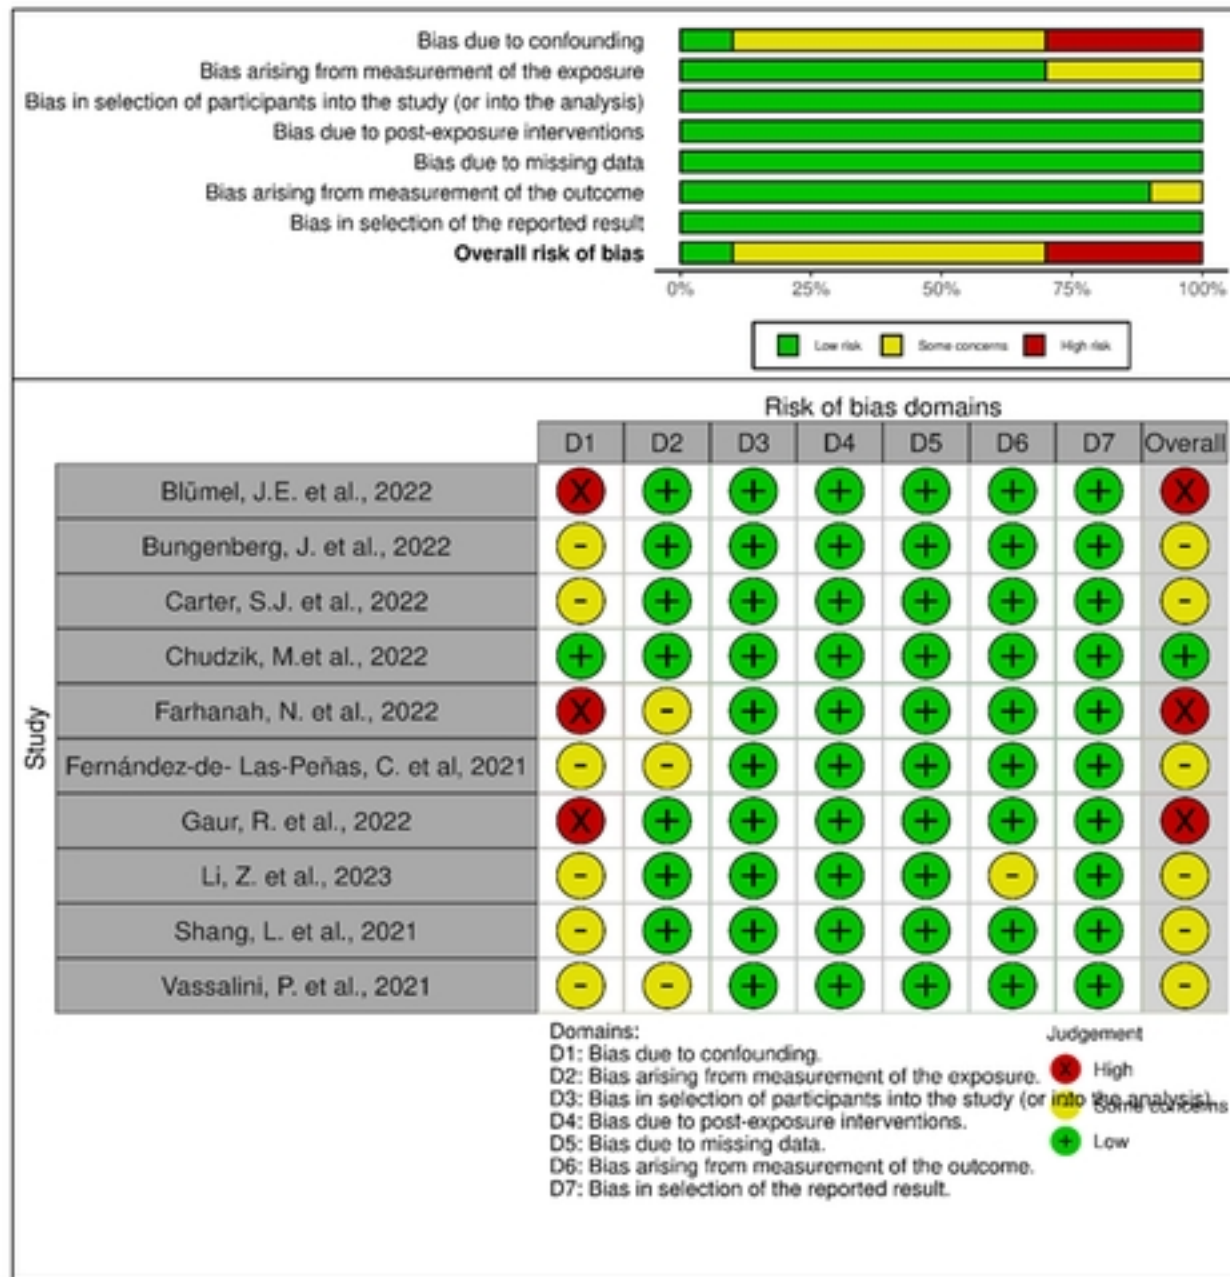

Figure 5

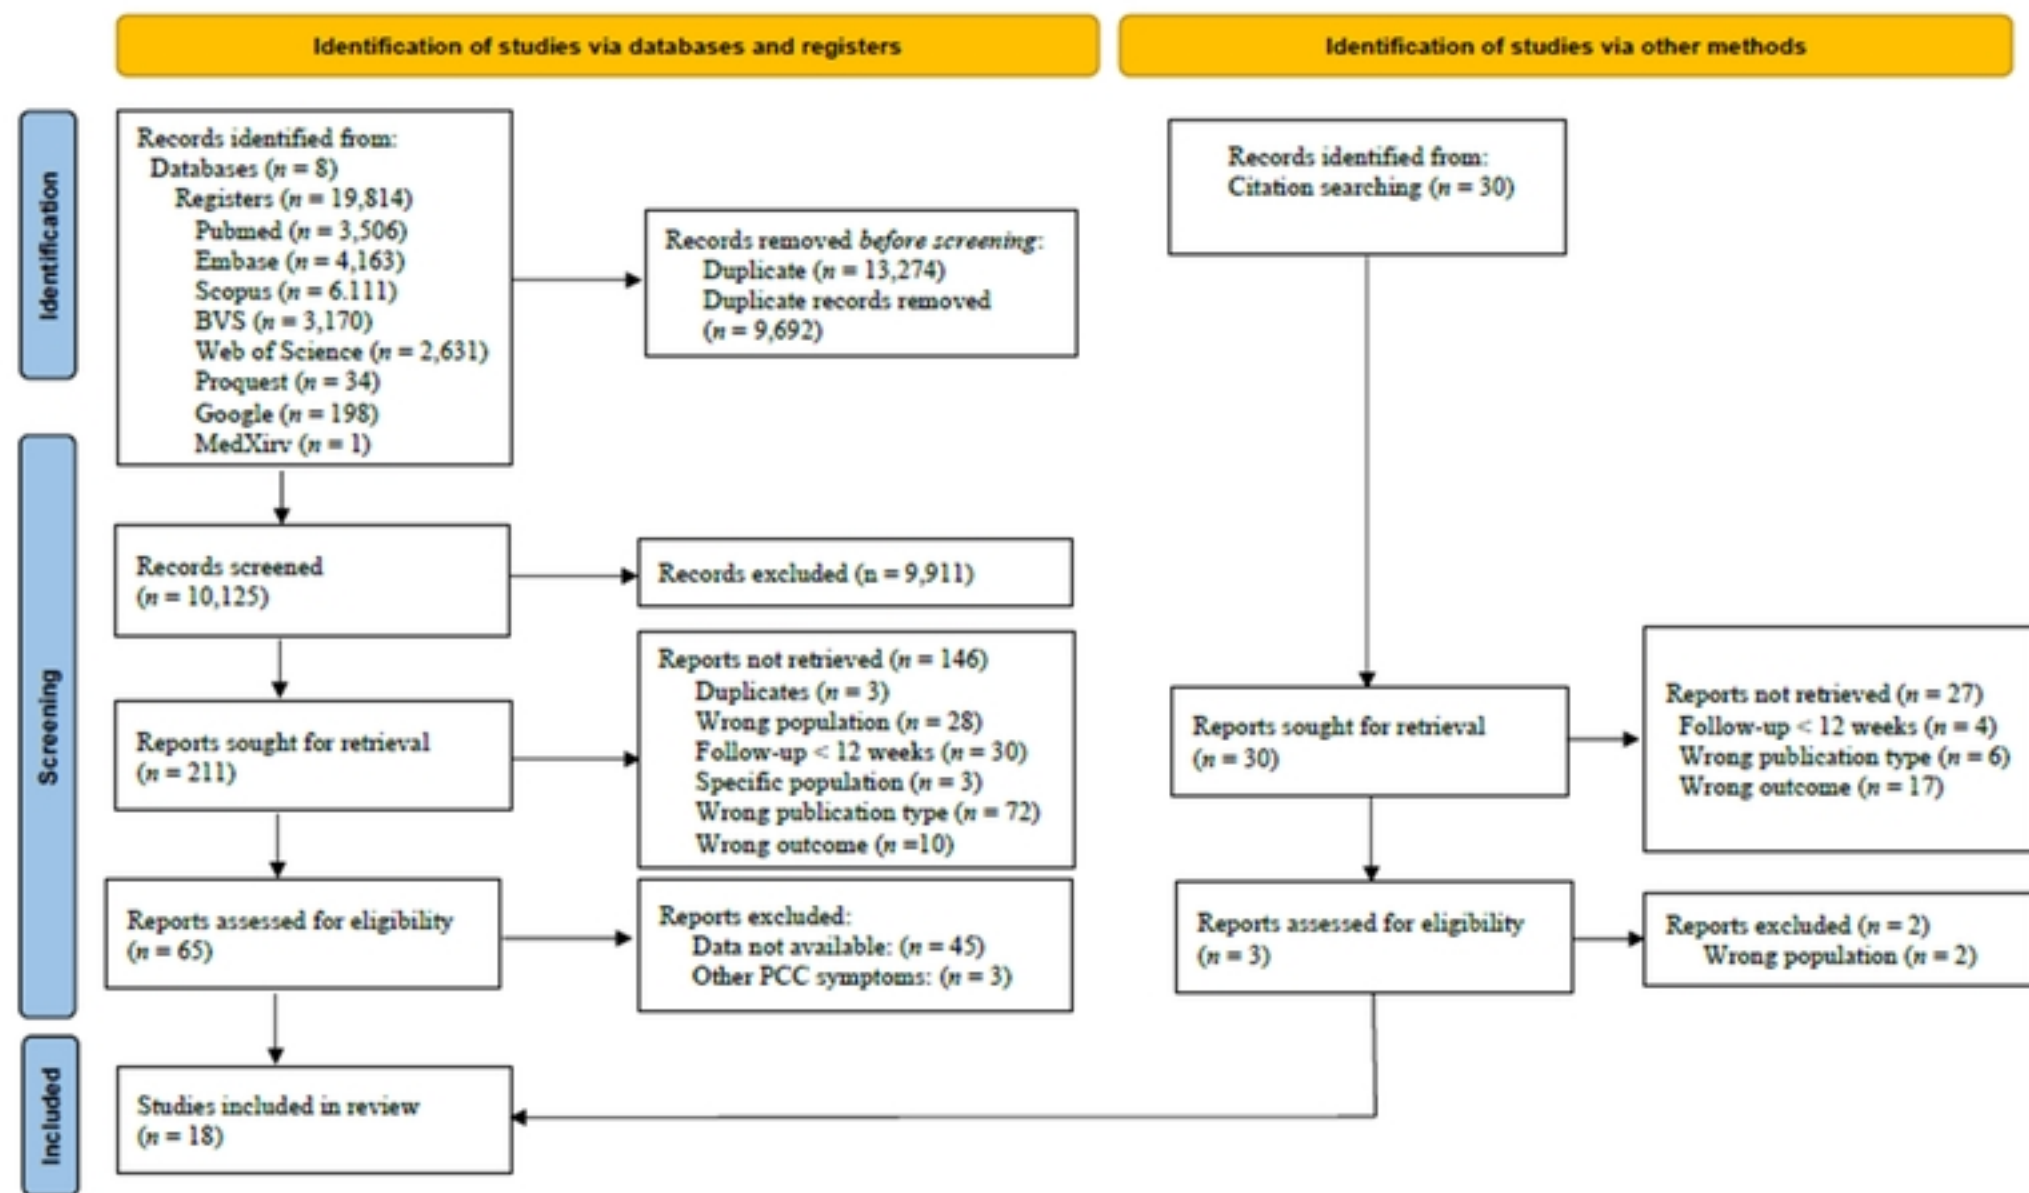

Figure 1

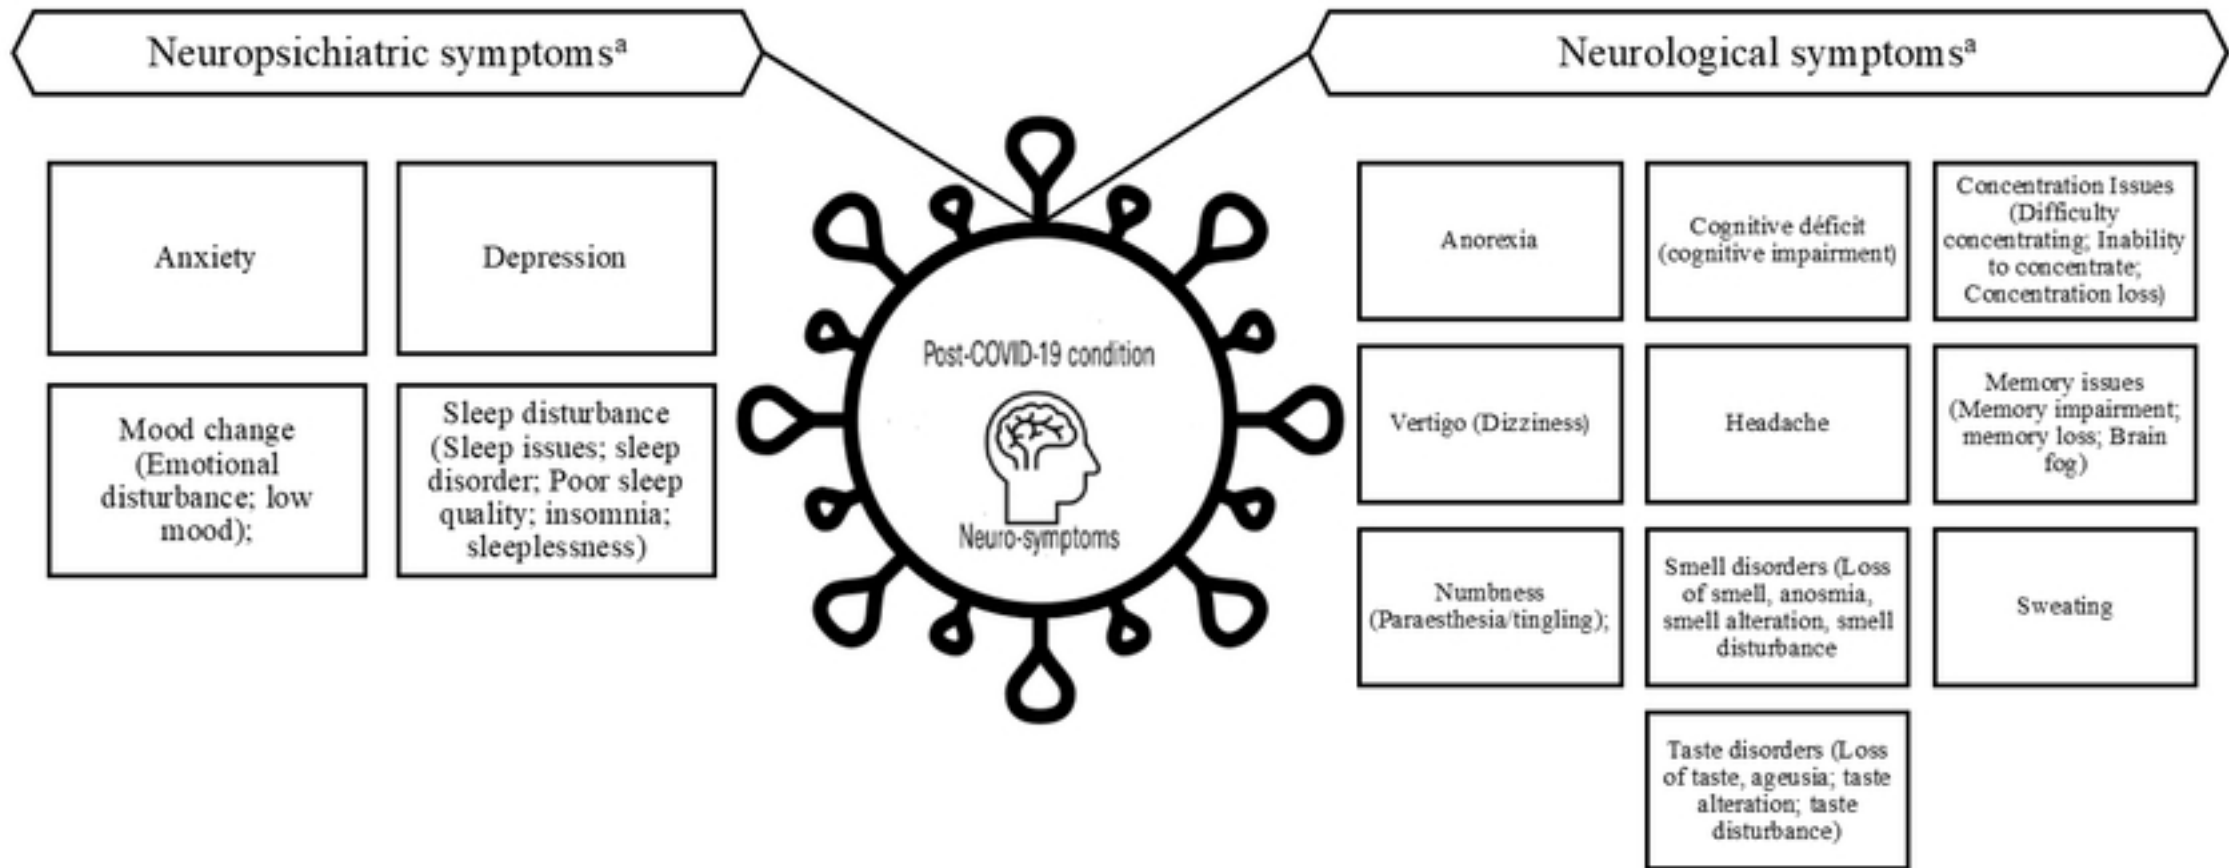

Figure 2
